# Supplementary figures and images for: Analyses of Transcriptomics upon IL-1β-Stimulated Mouse Chondrocytes and the Protective Effect of Catalpol through the NOD2/NF-κB/MAPK Signaling Pathway
Source: MDPI journal article supplement (doi:10.3390/molecules28041606), 2023-02-07

# Enriched GO Terms (Top 30)

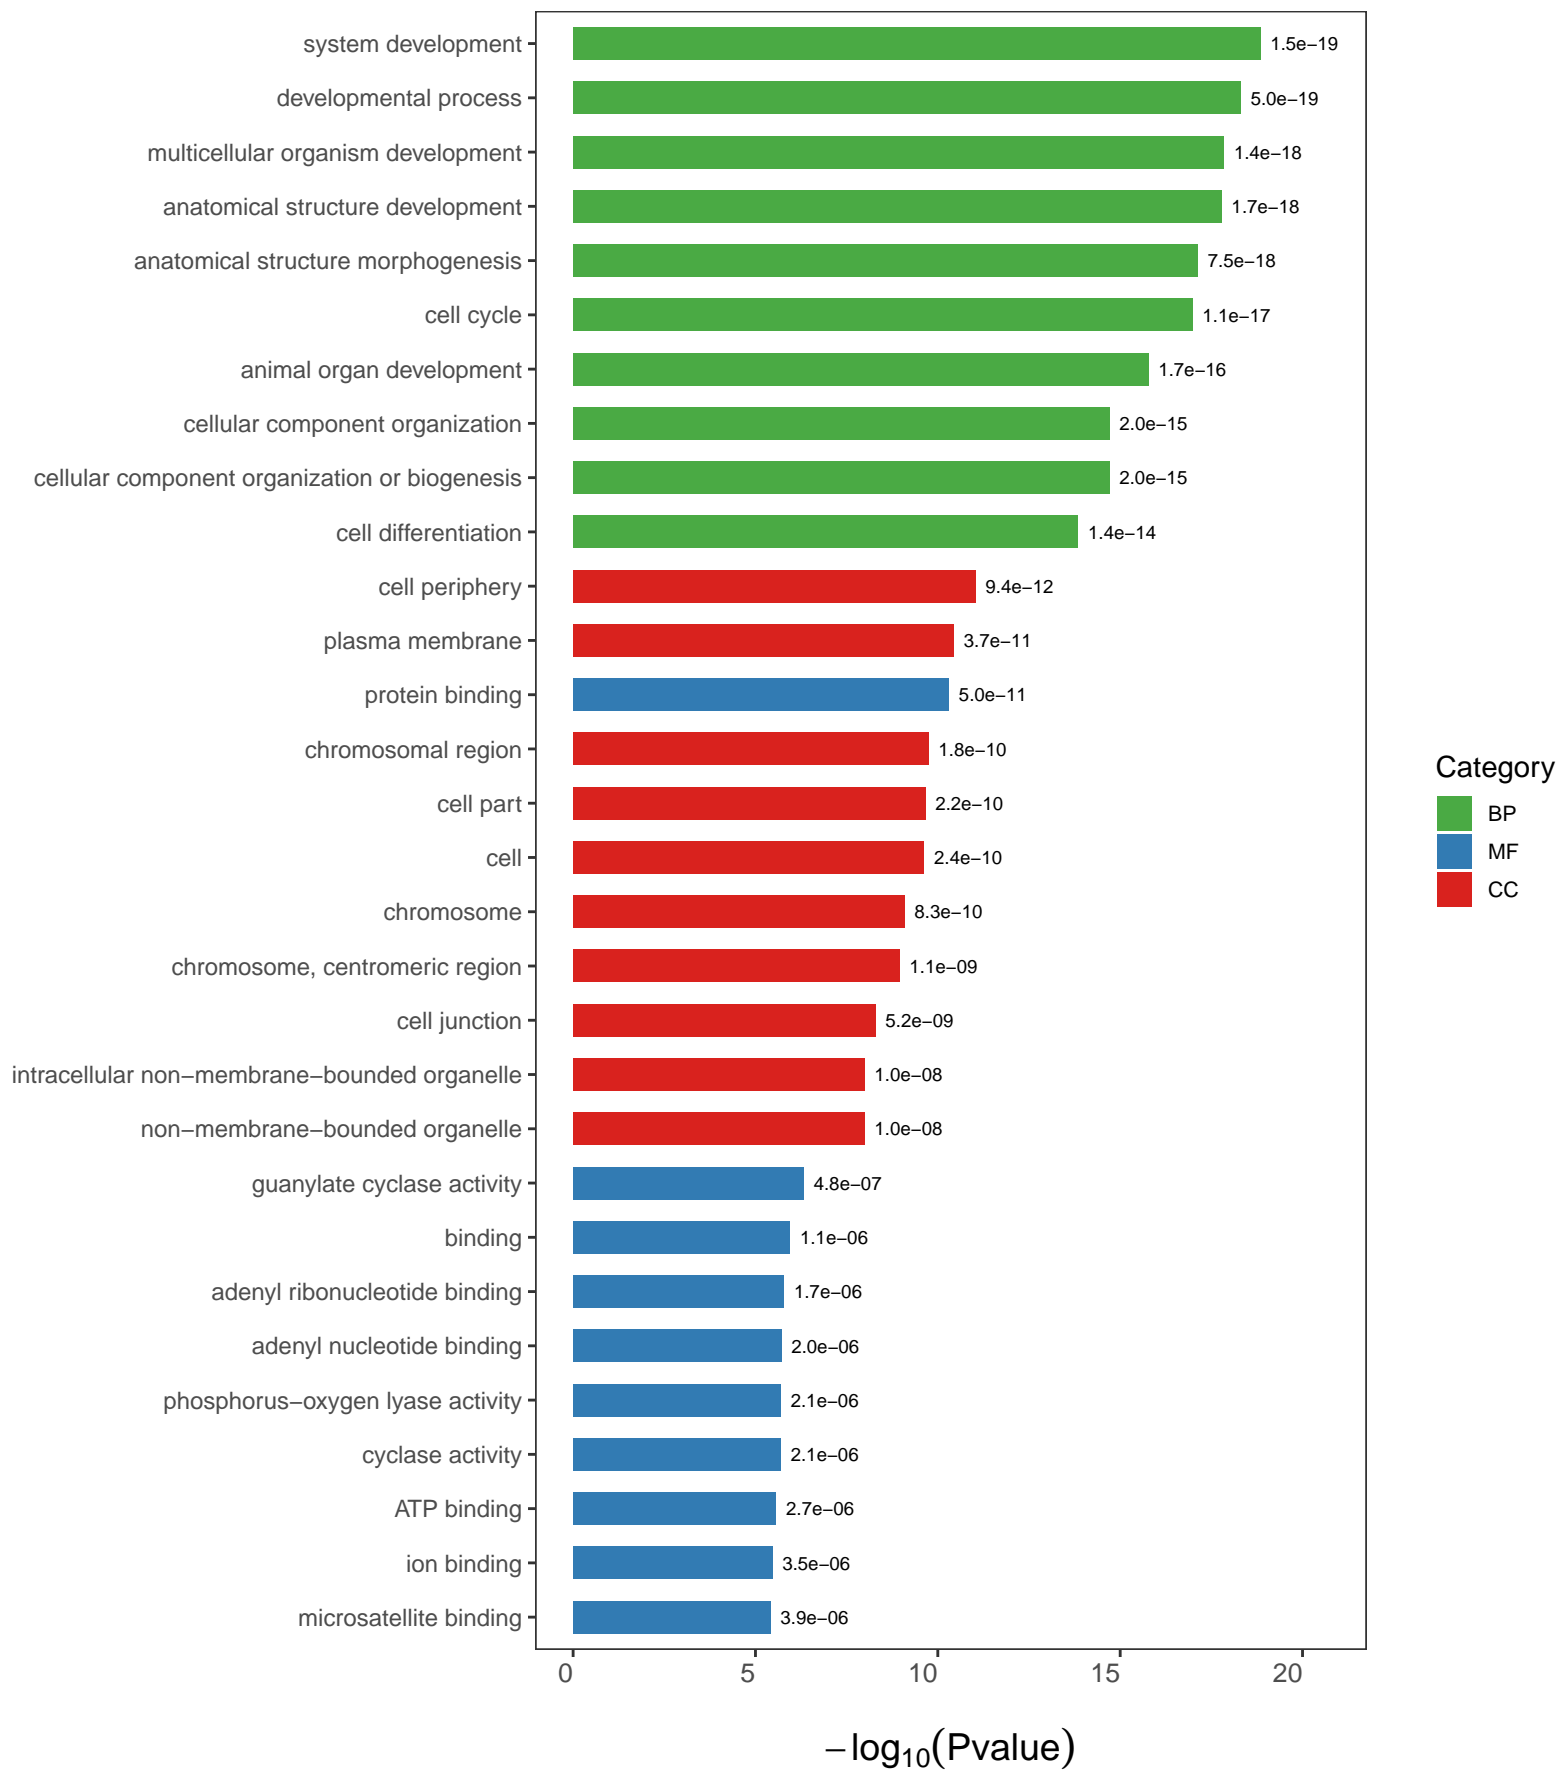

Supplement: s1 [file s1]

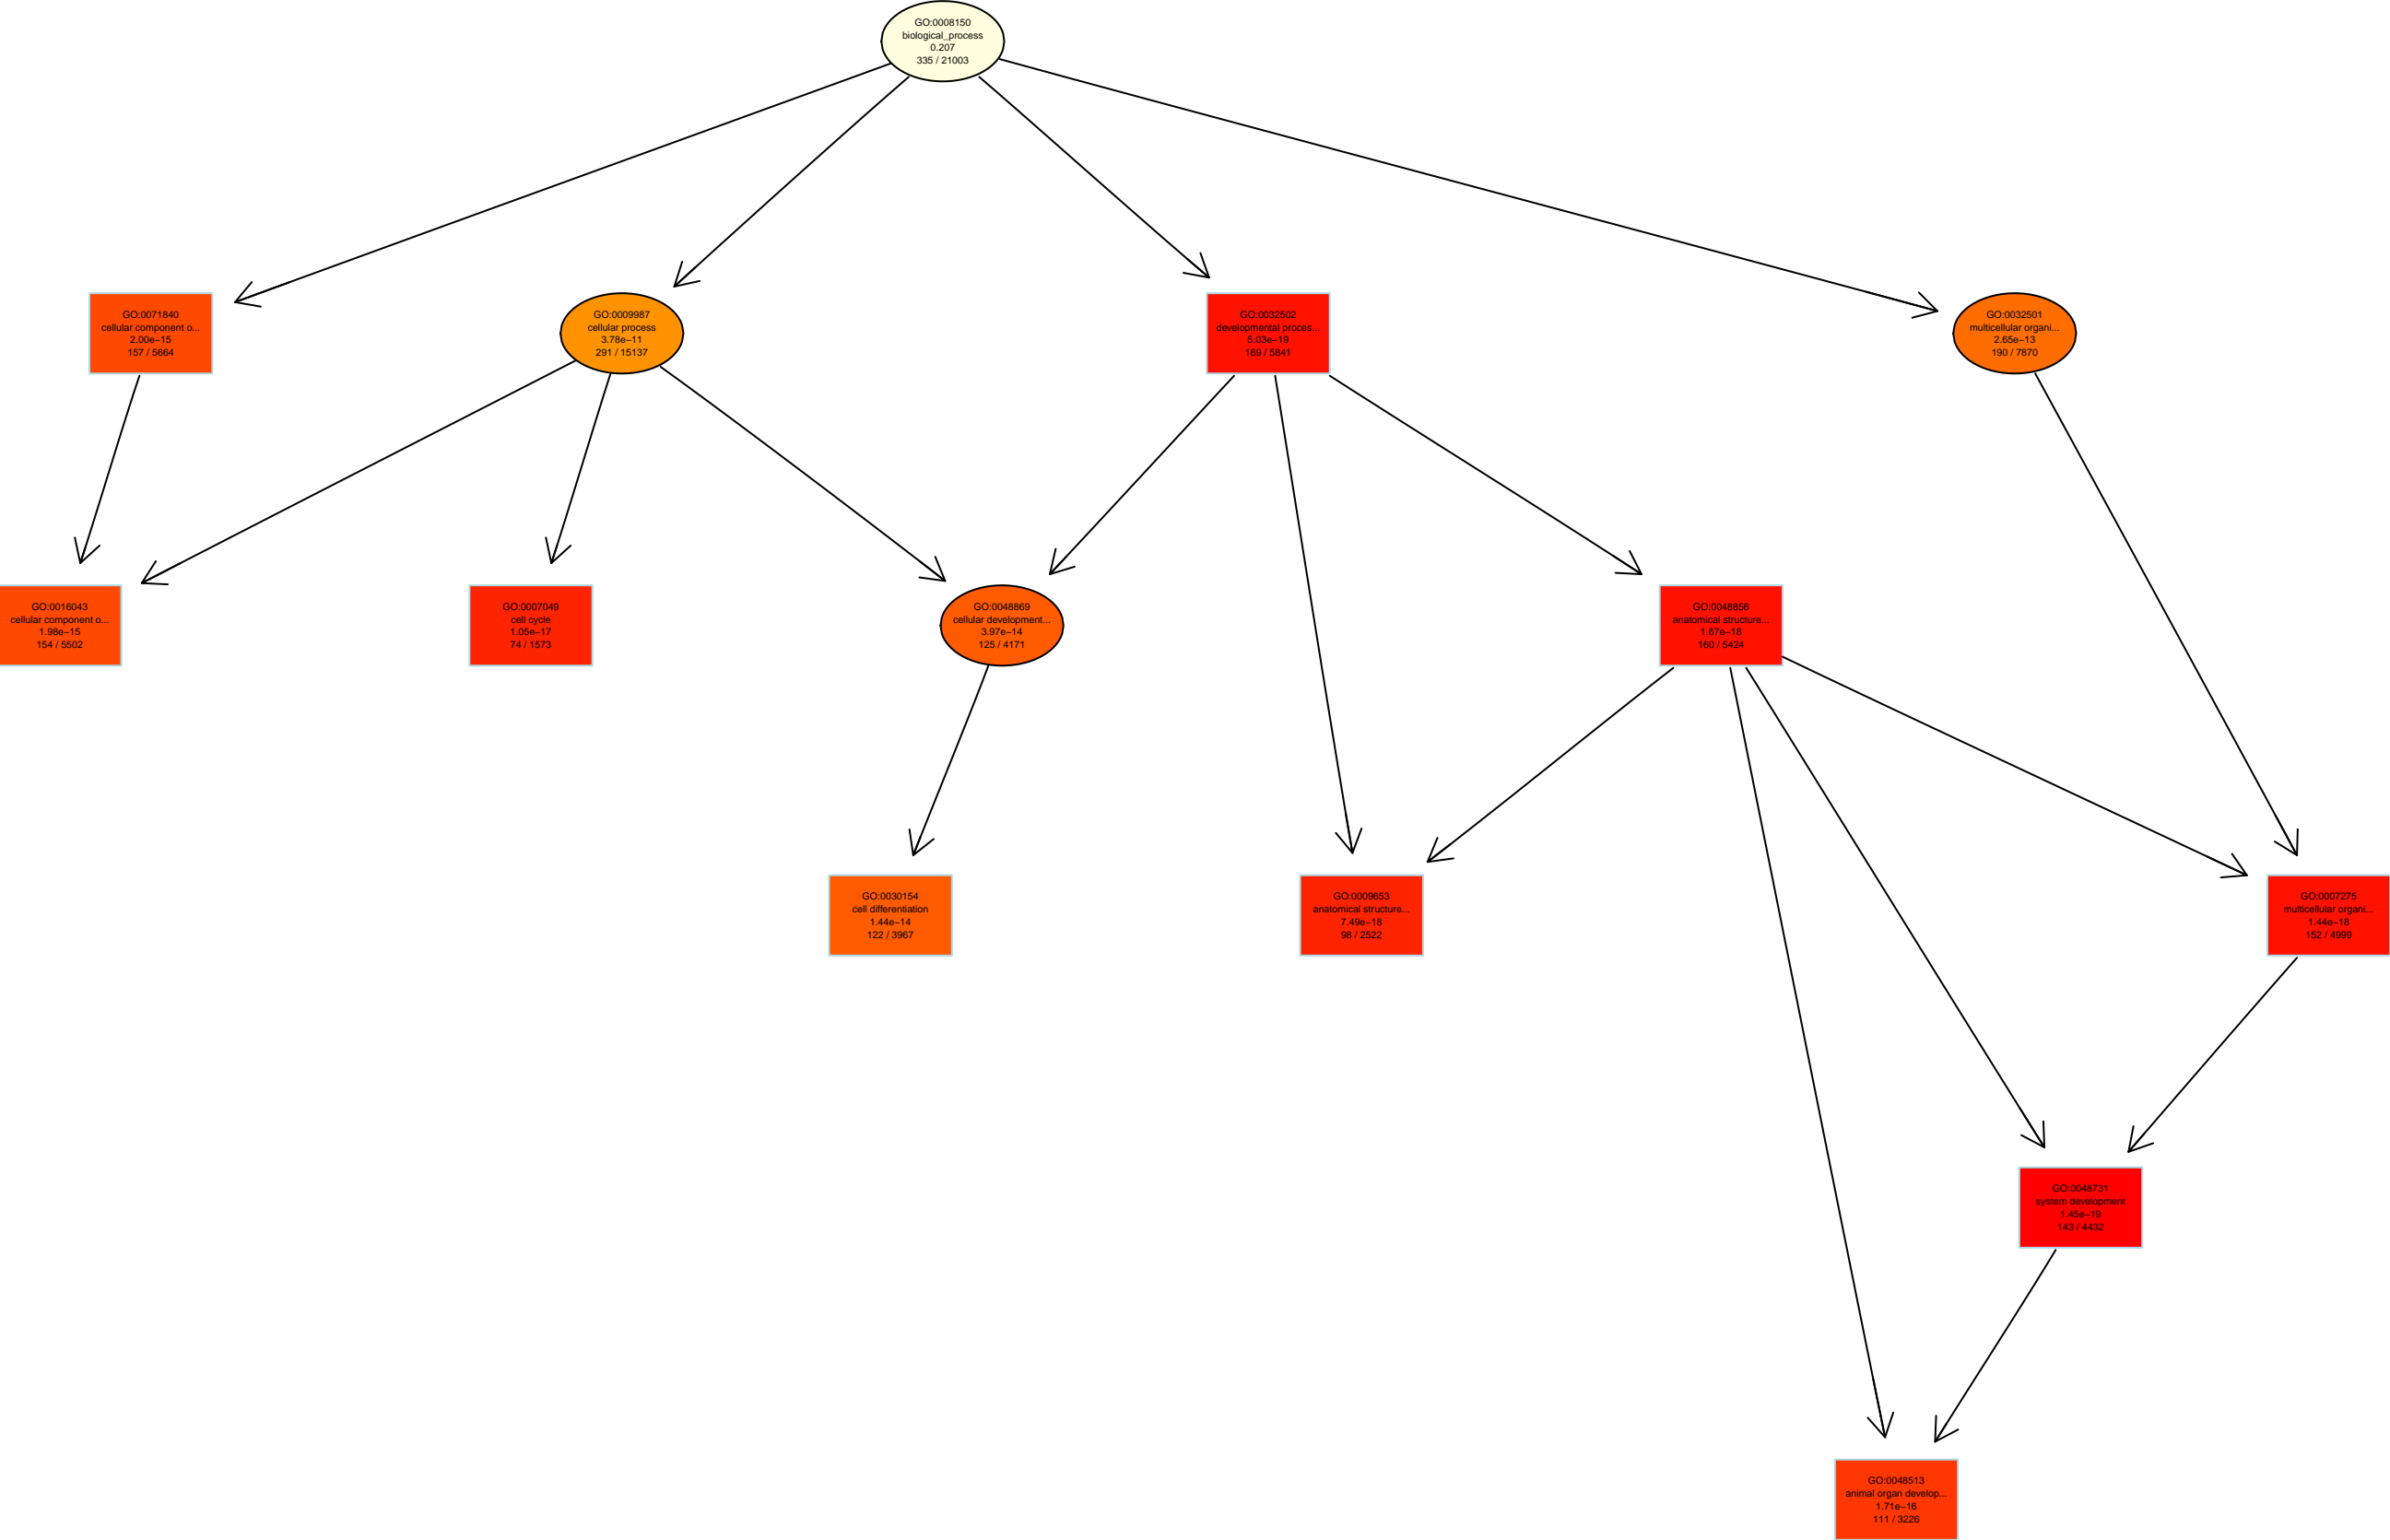

Supplement: s1 [file s1]

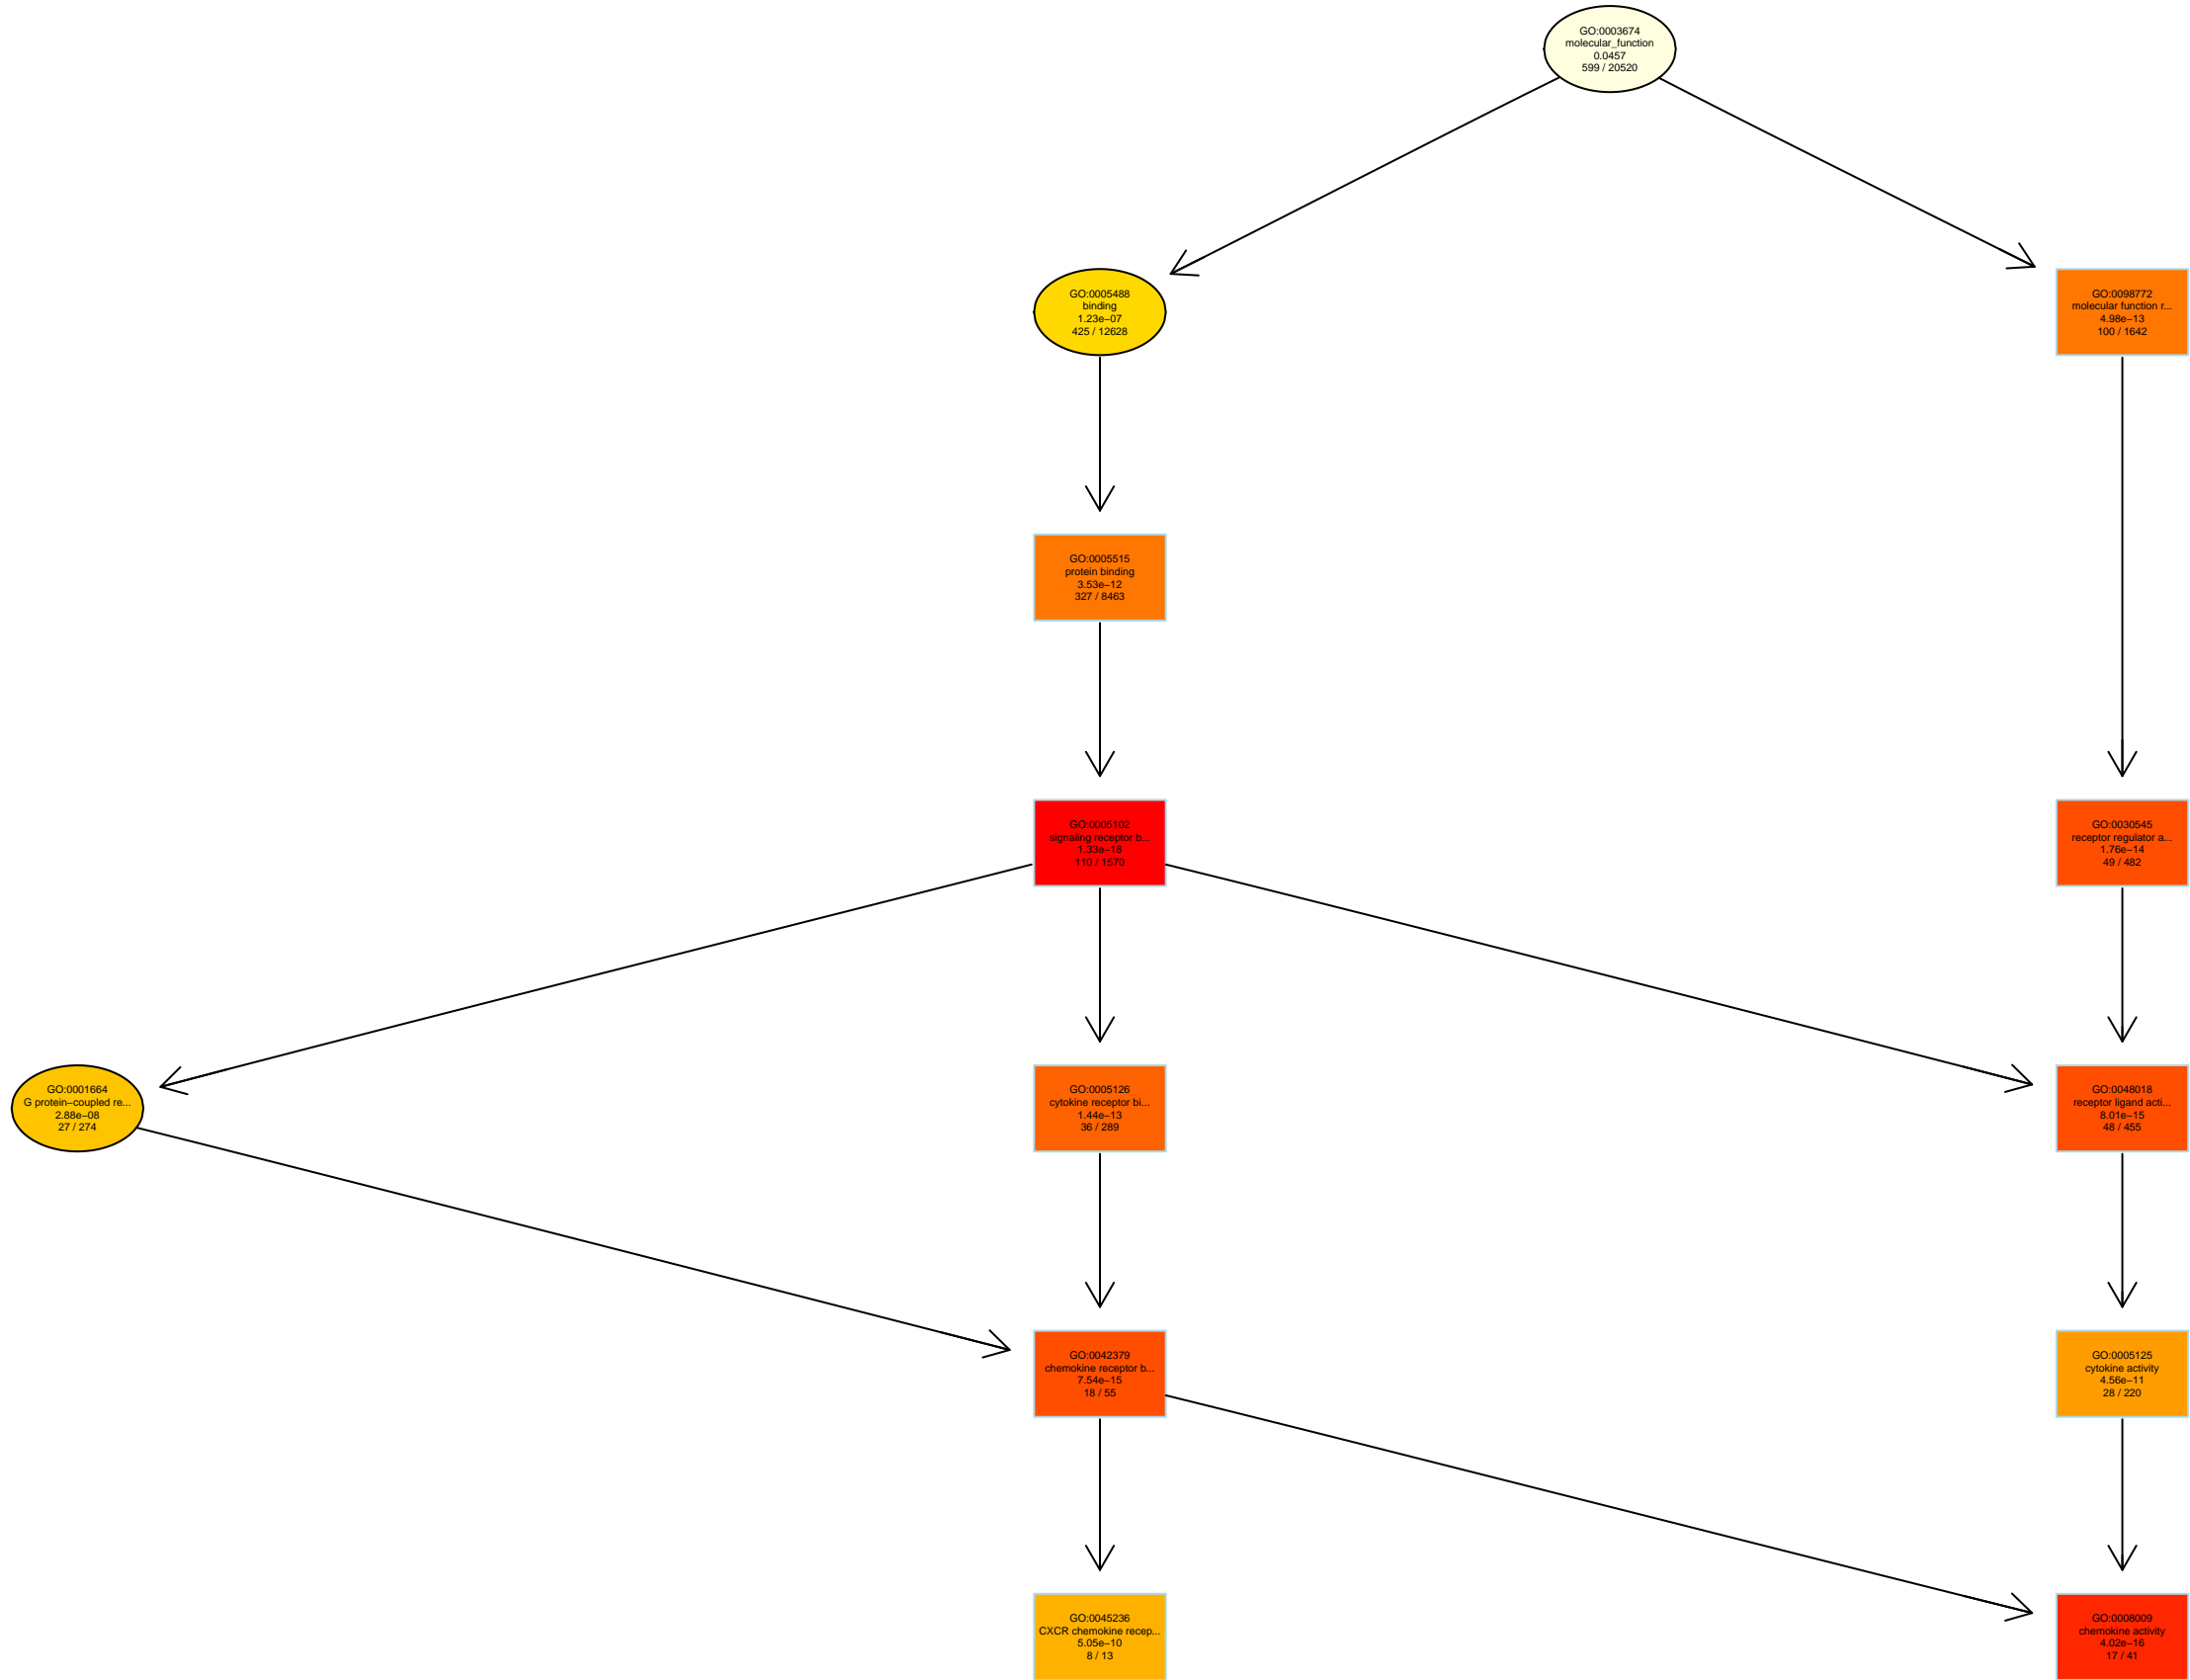

Supplement: s1 [file s1]

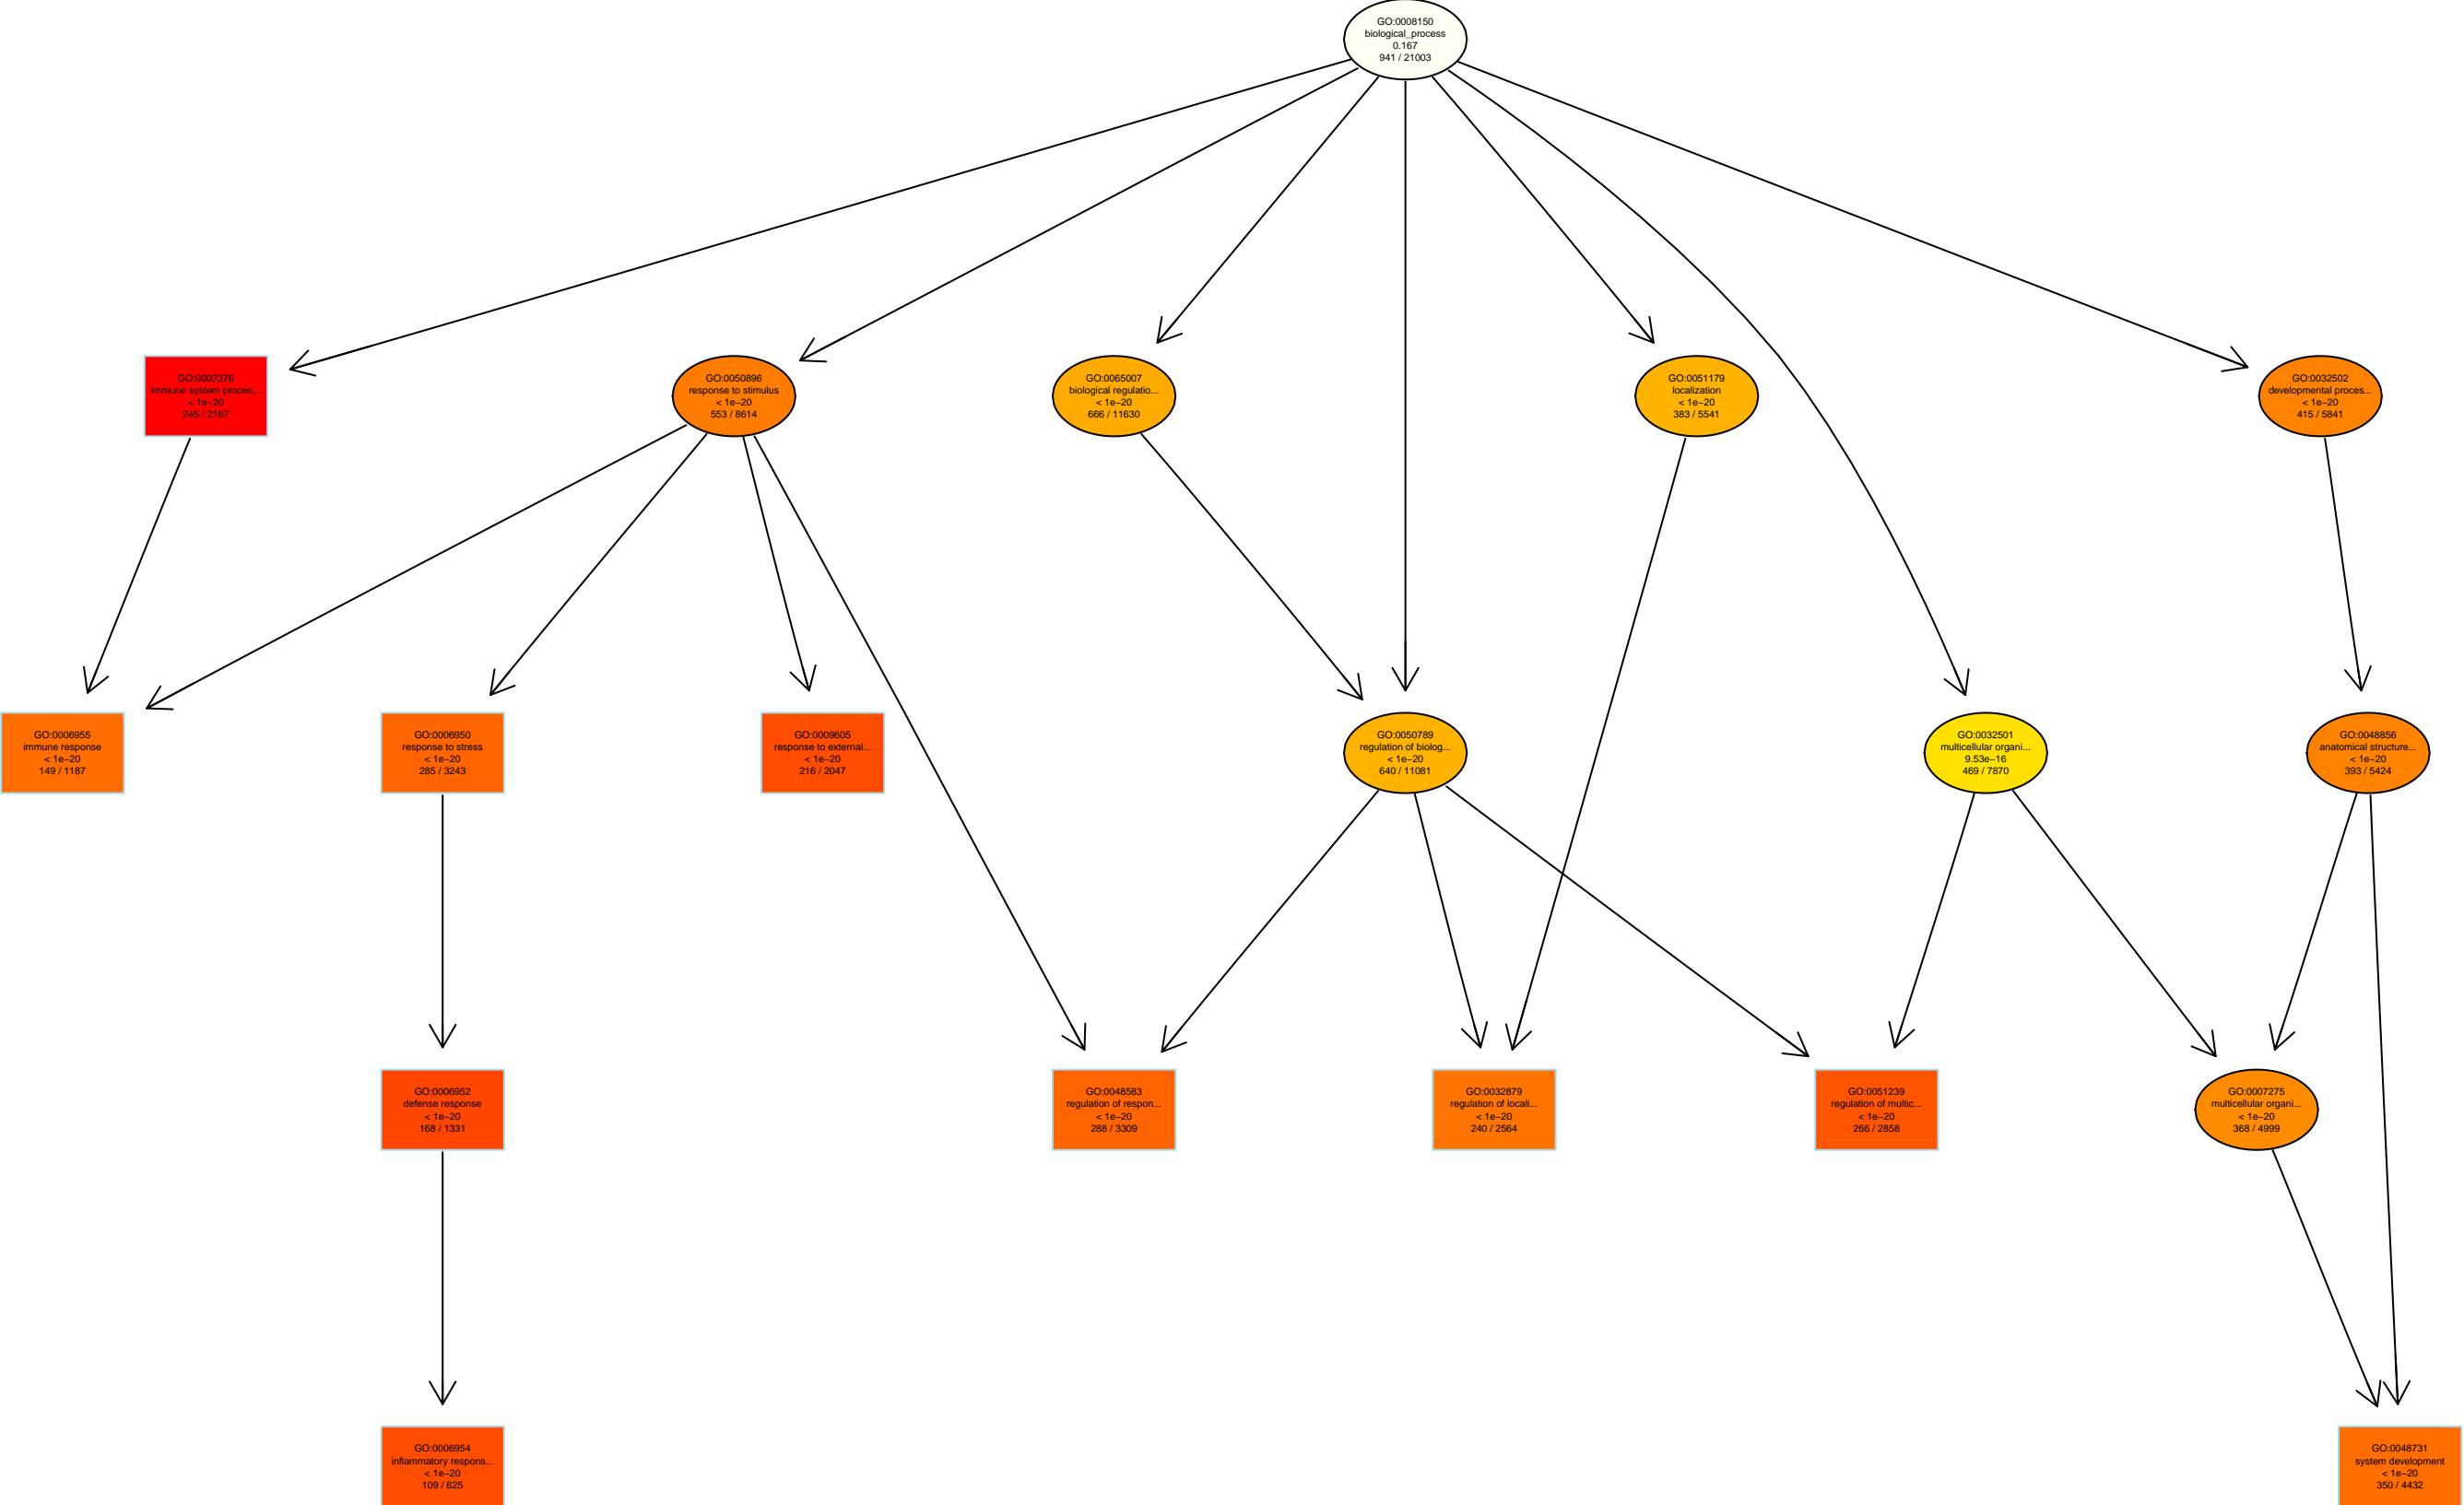

Supplement: s1 [file s1]

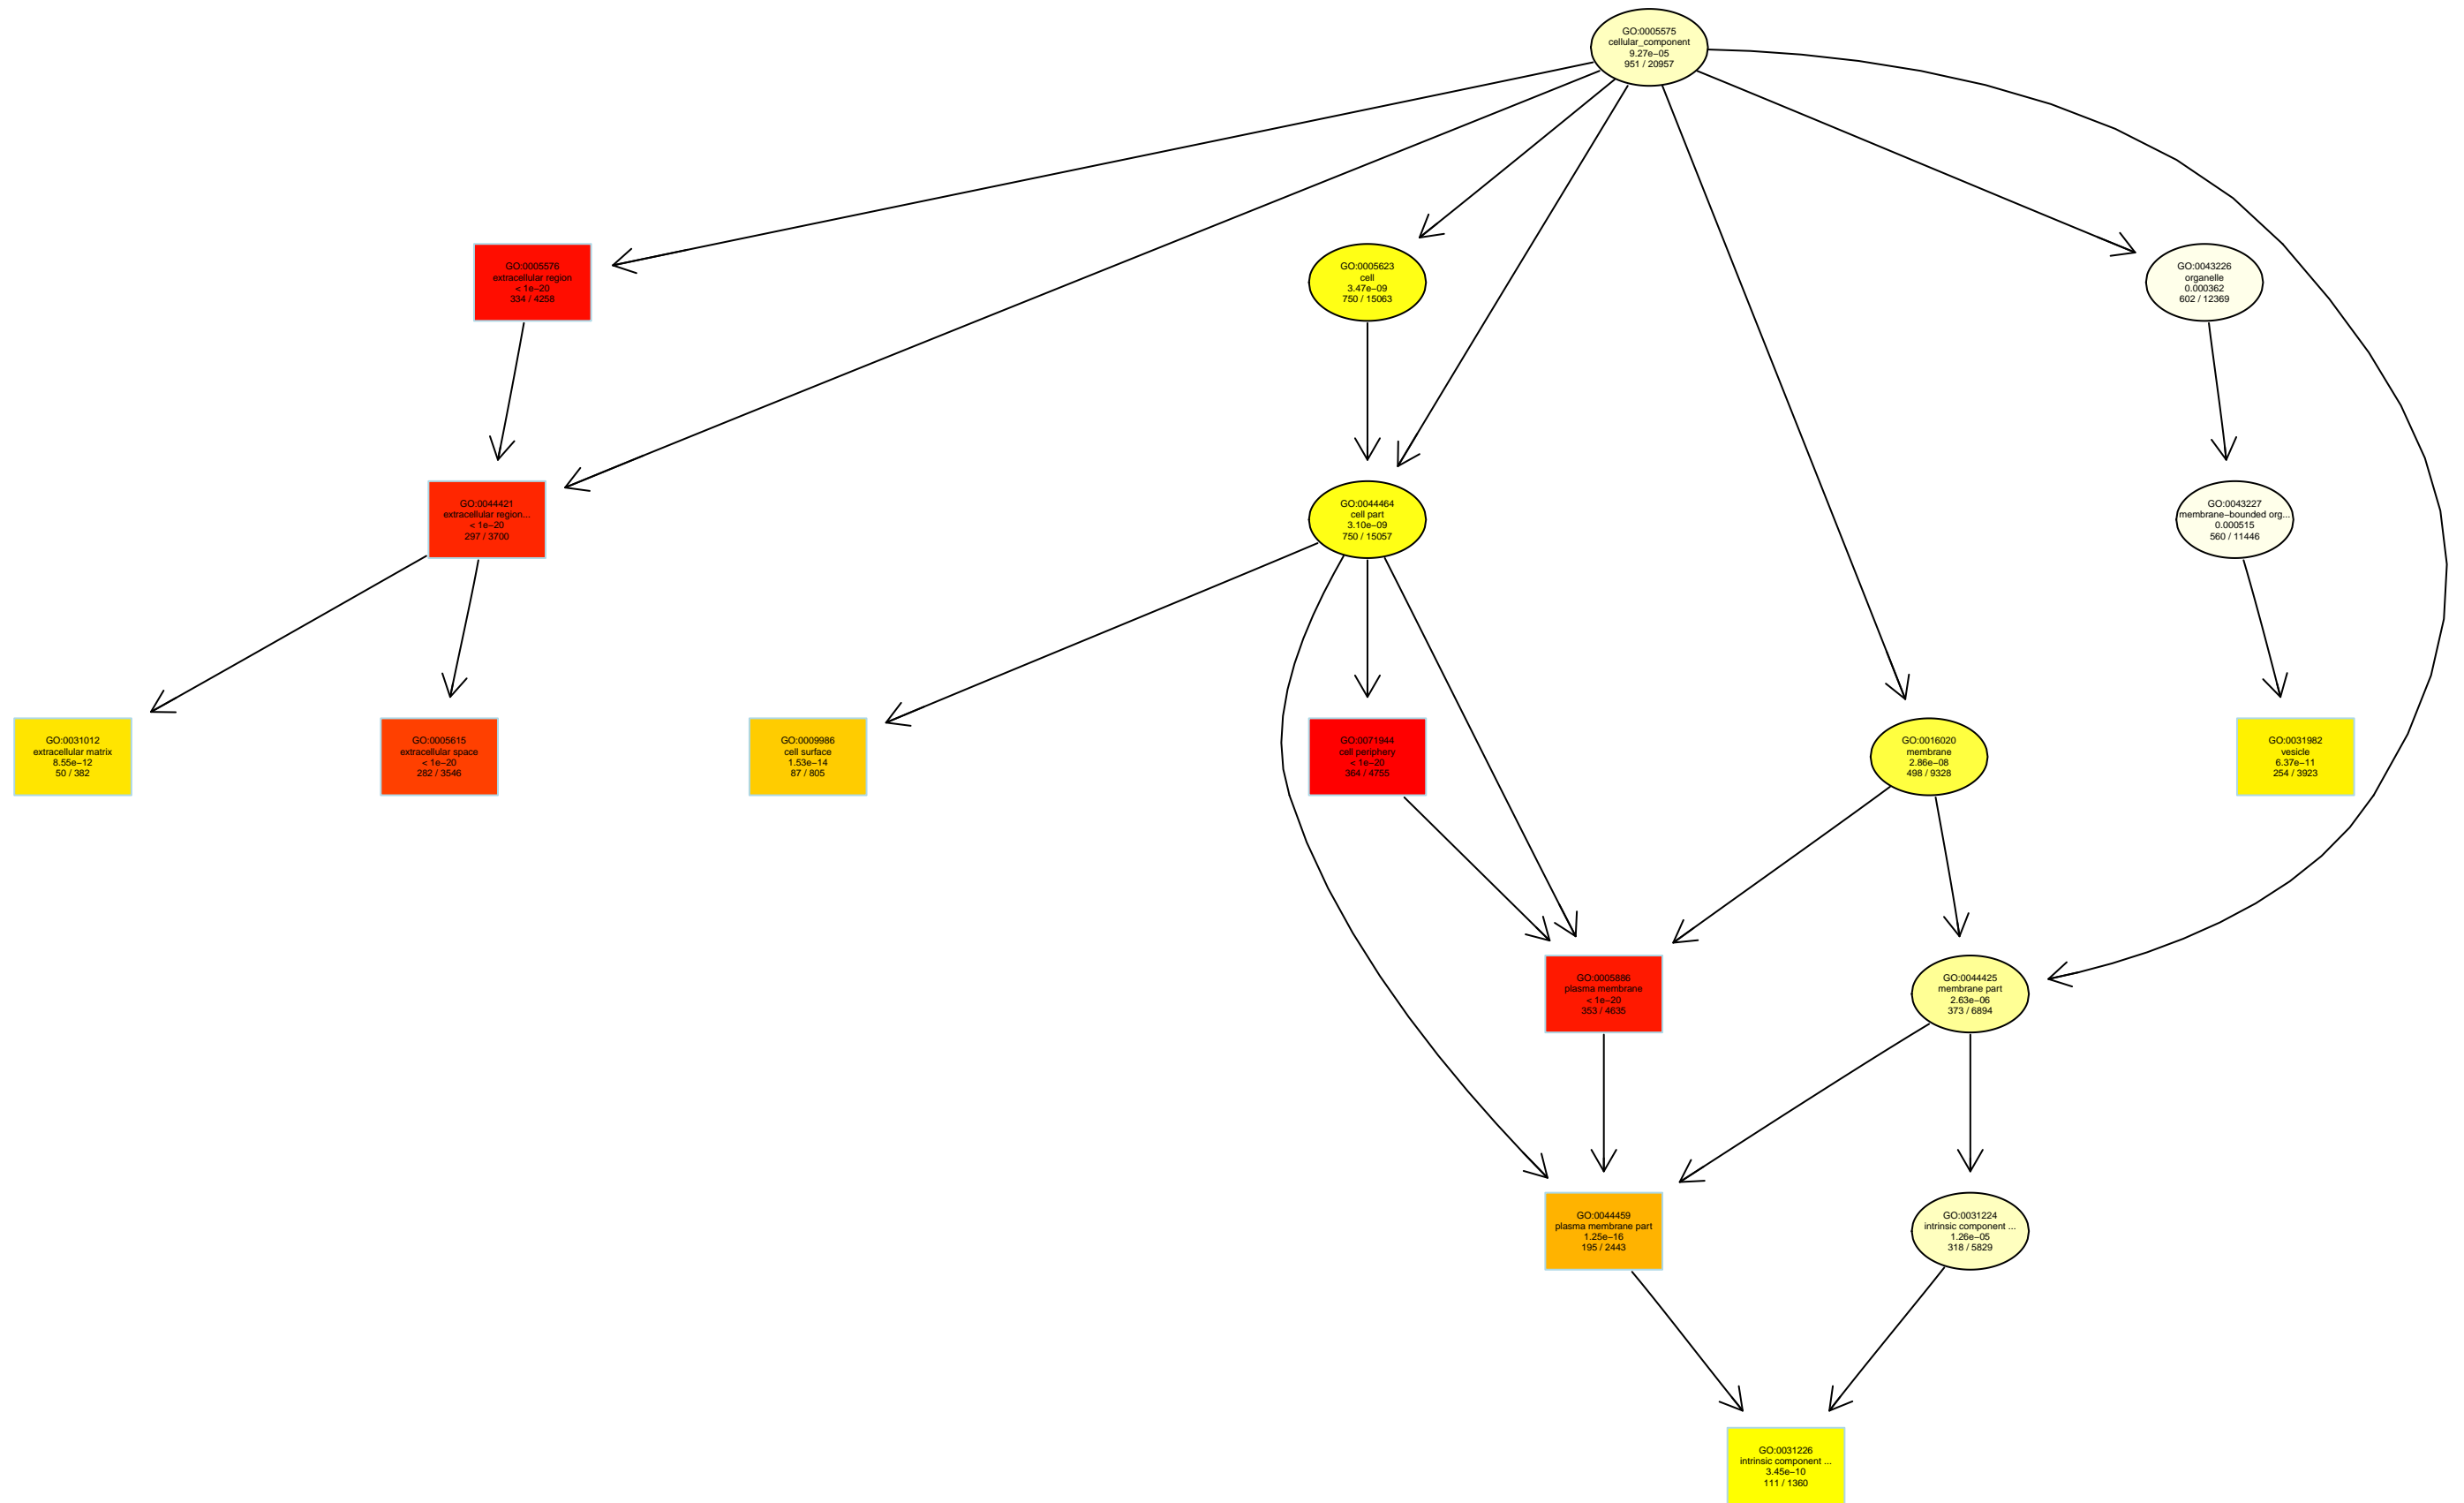

Supplement: s1 [file s1]

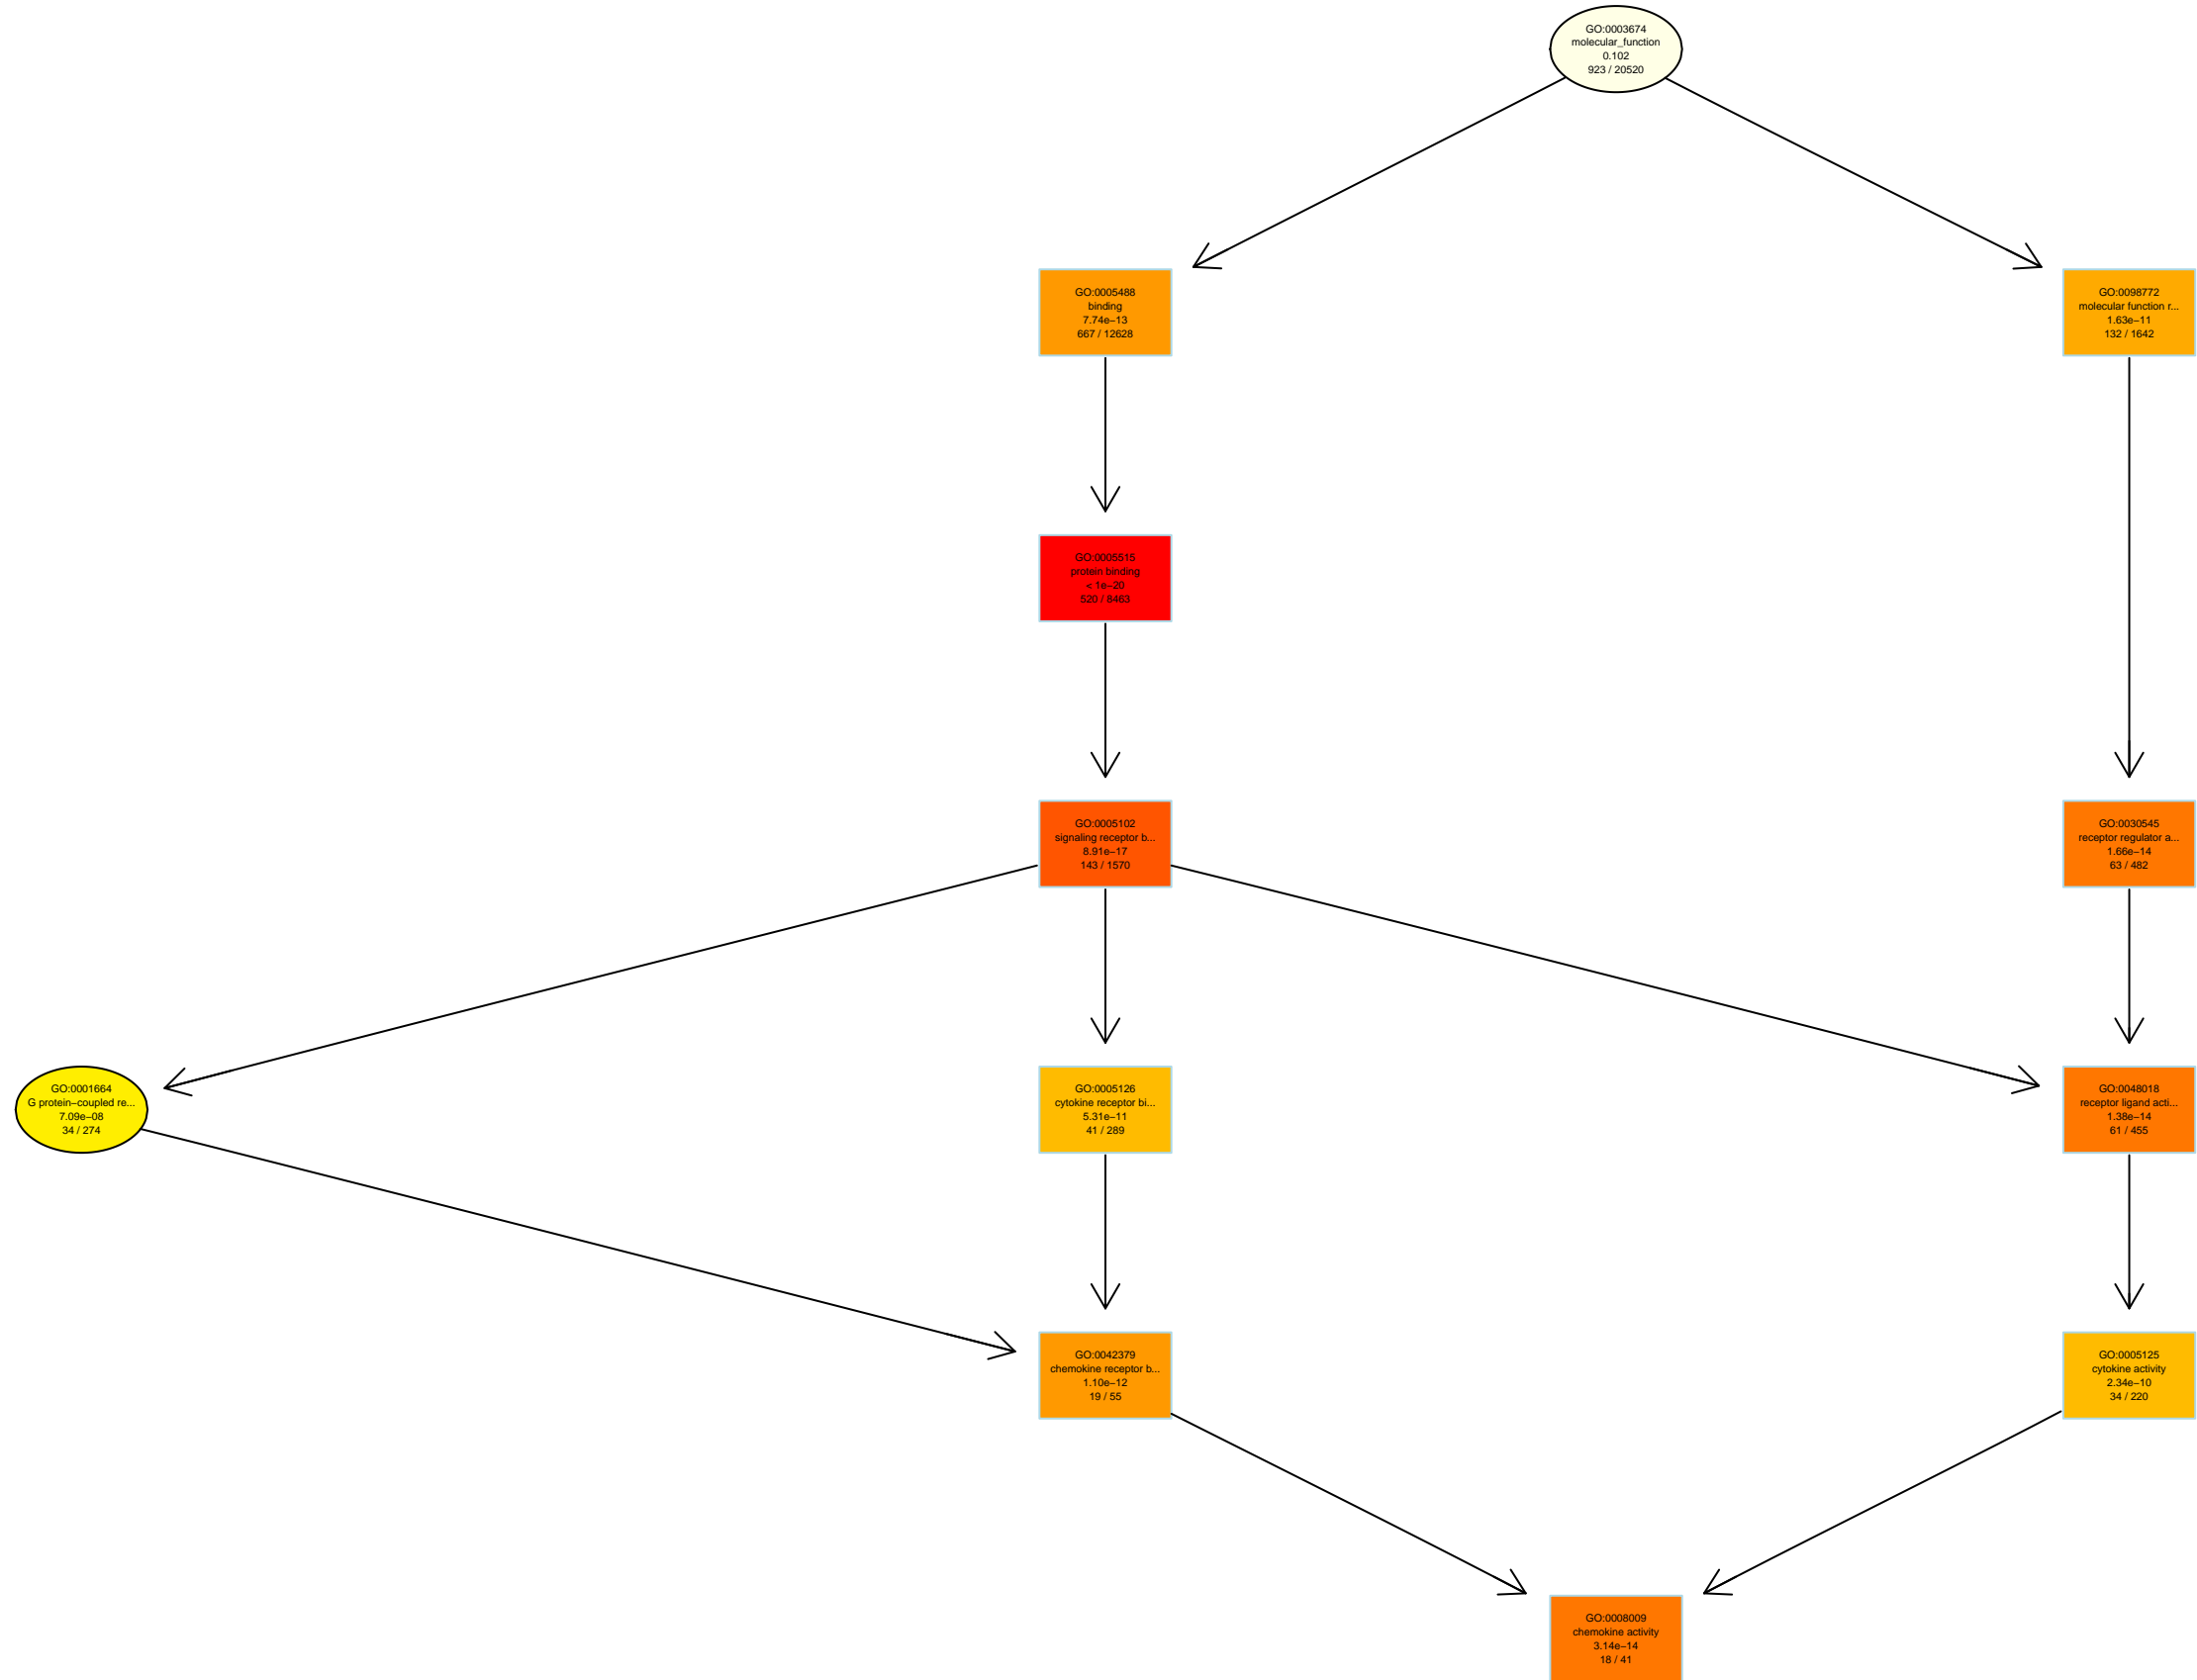

Supplement: s1 [file s1]

# Enriched GO Terms (Top 30)

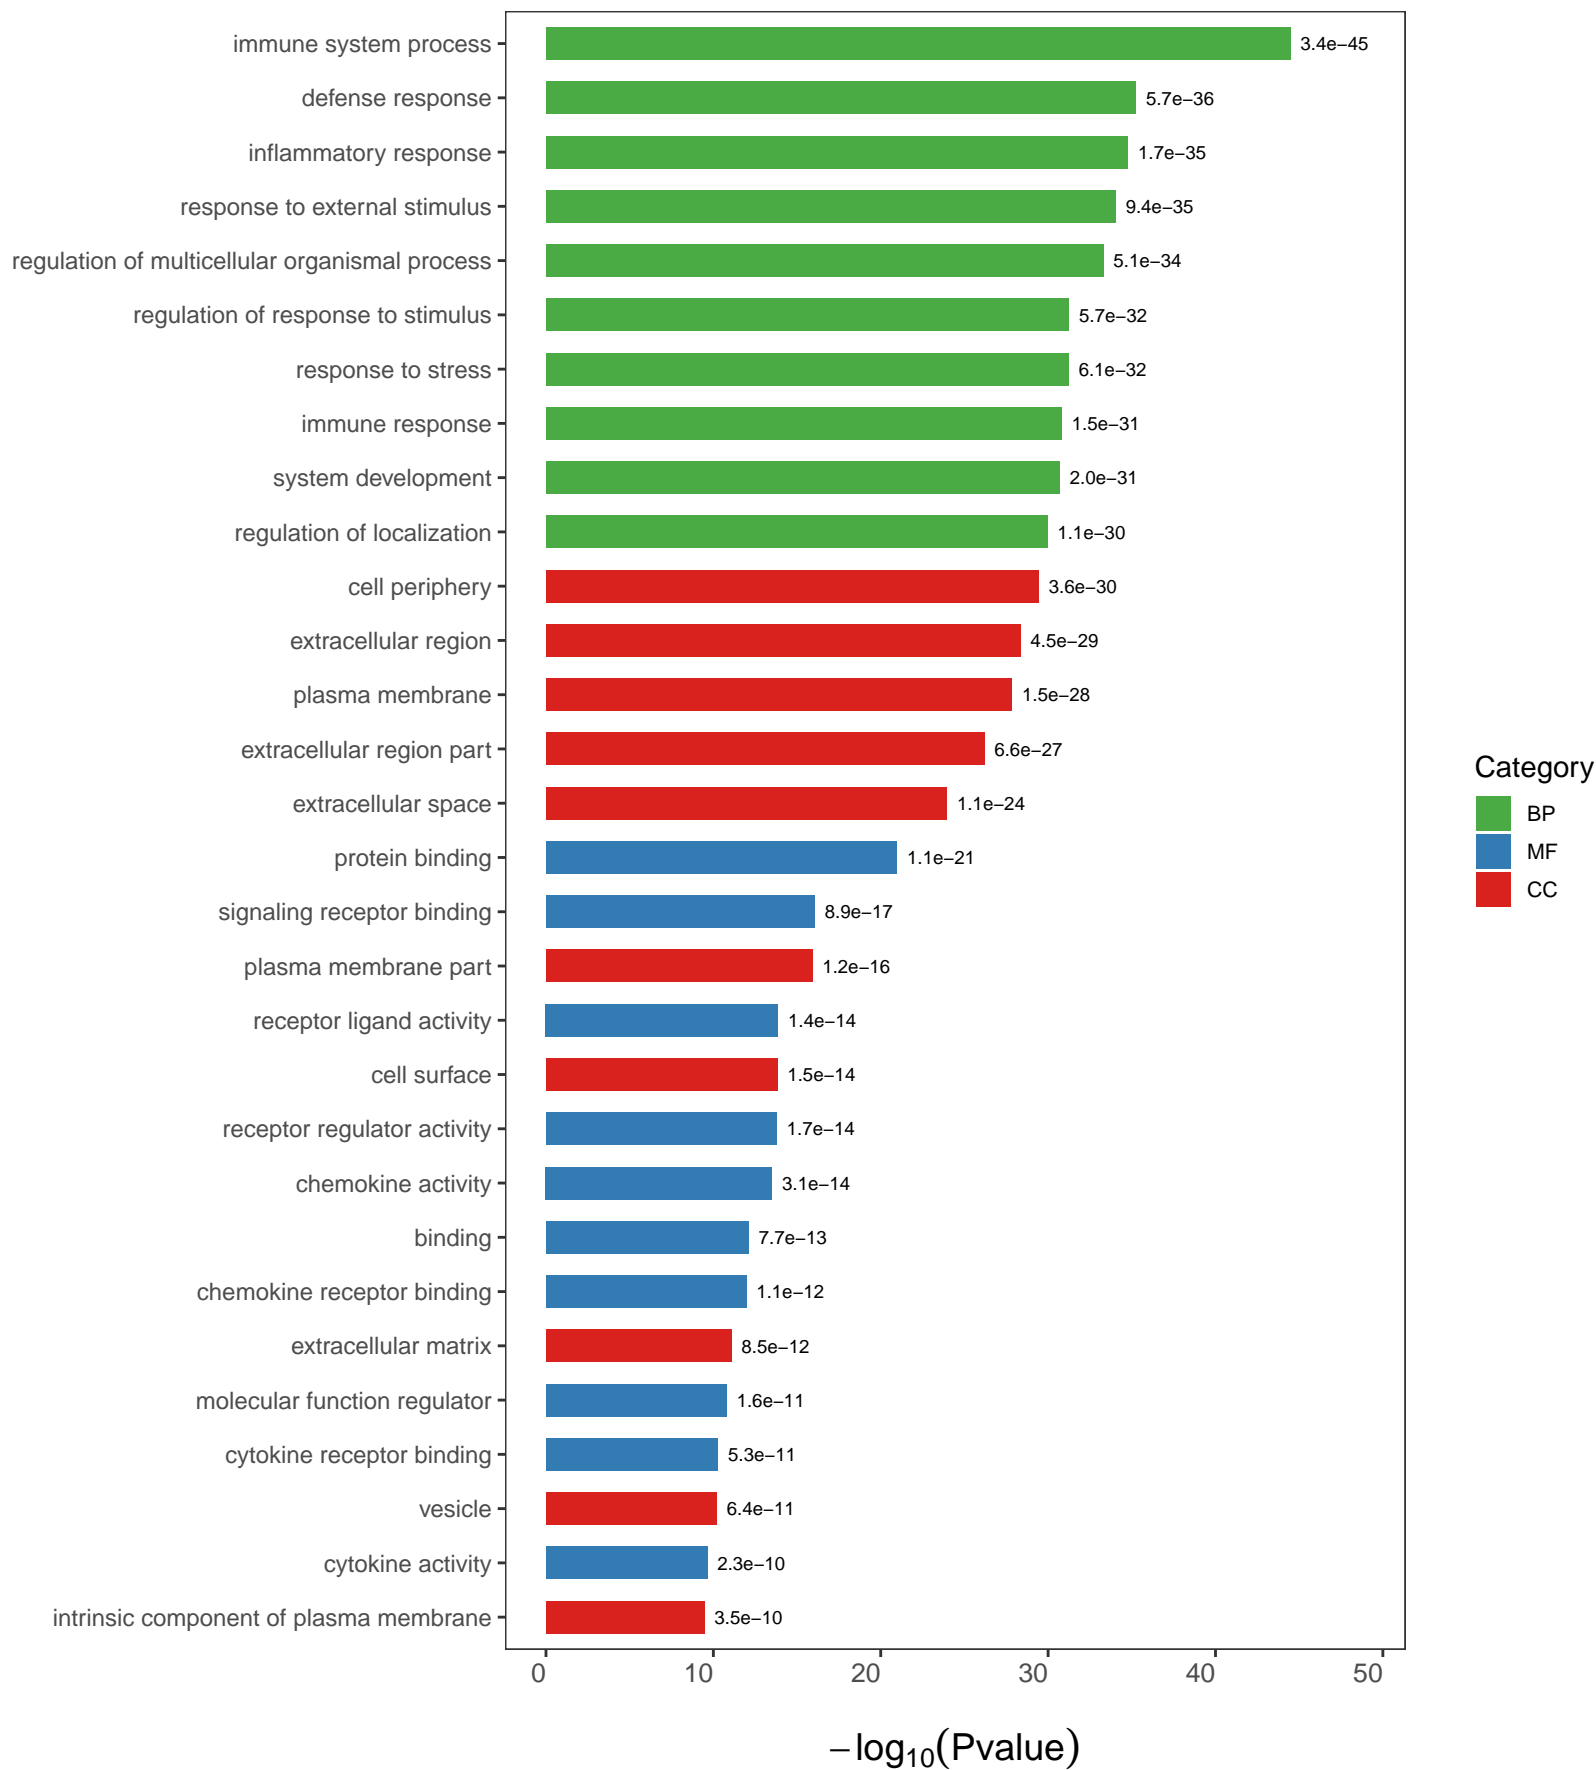

Supplement: s1 [file s1]

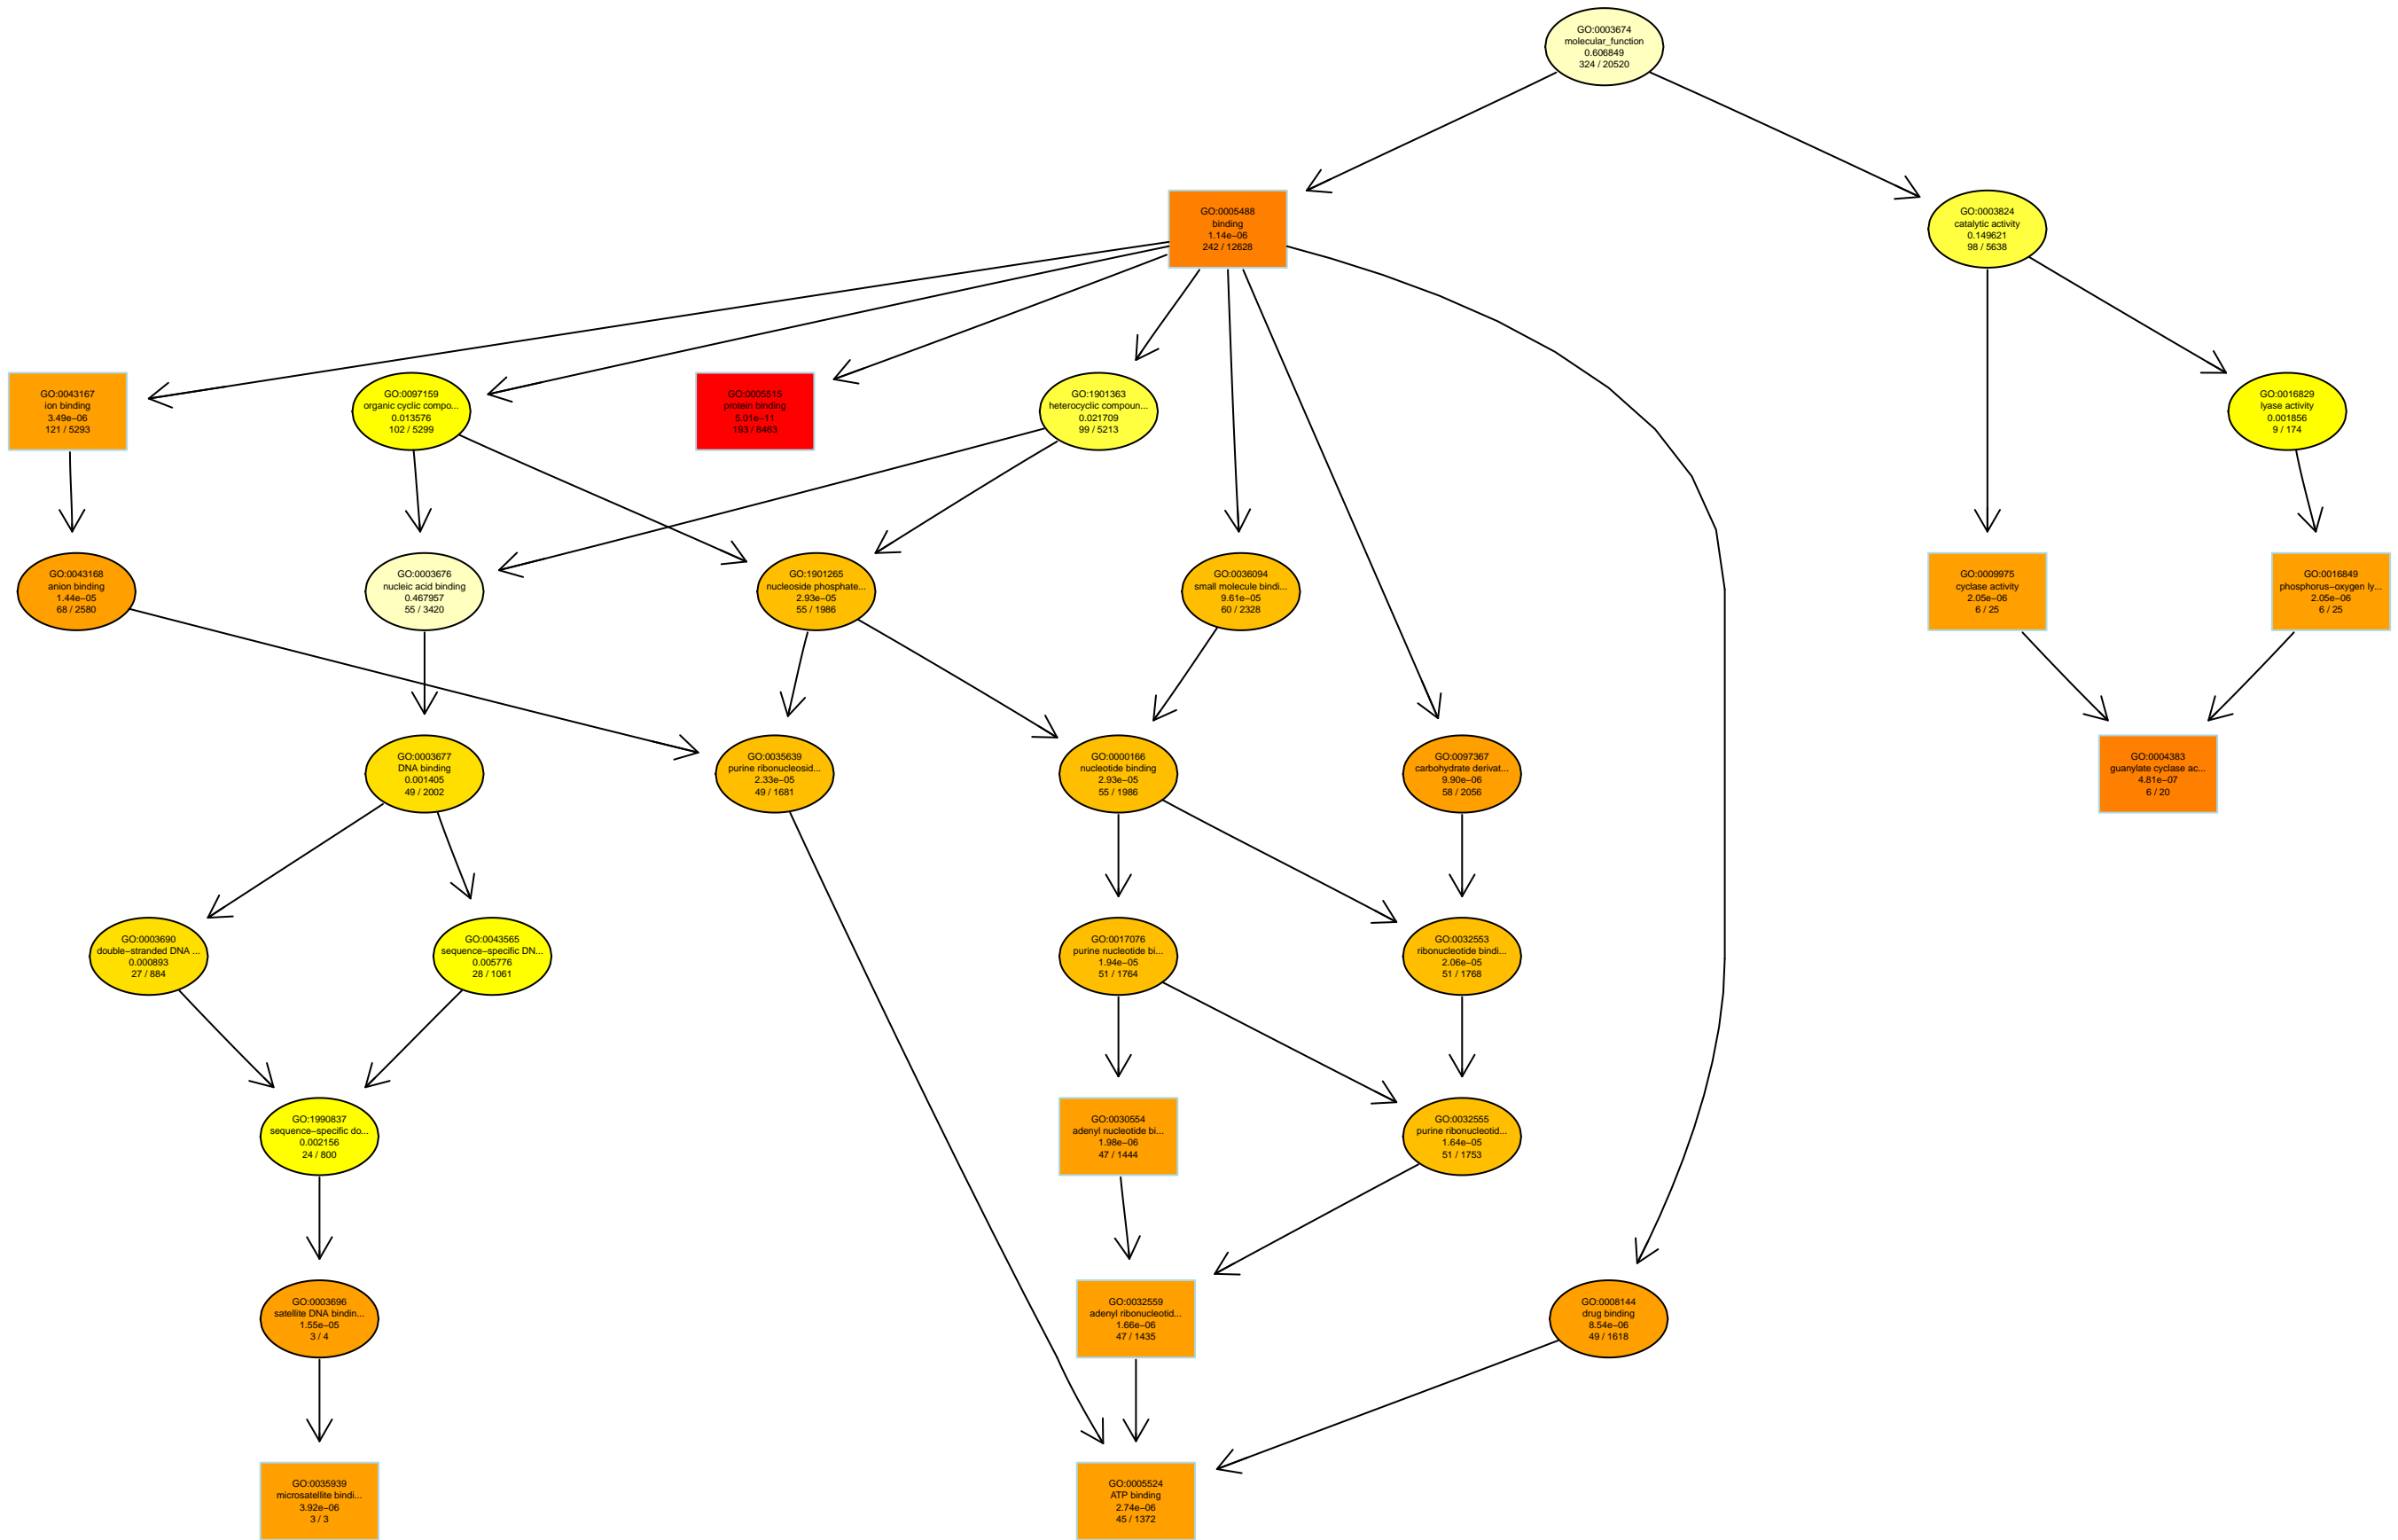

Supplement: s1 [file s1]

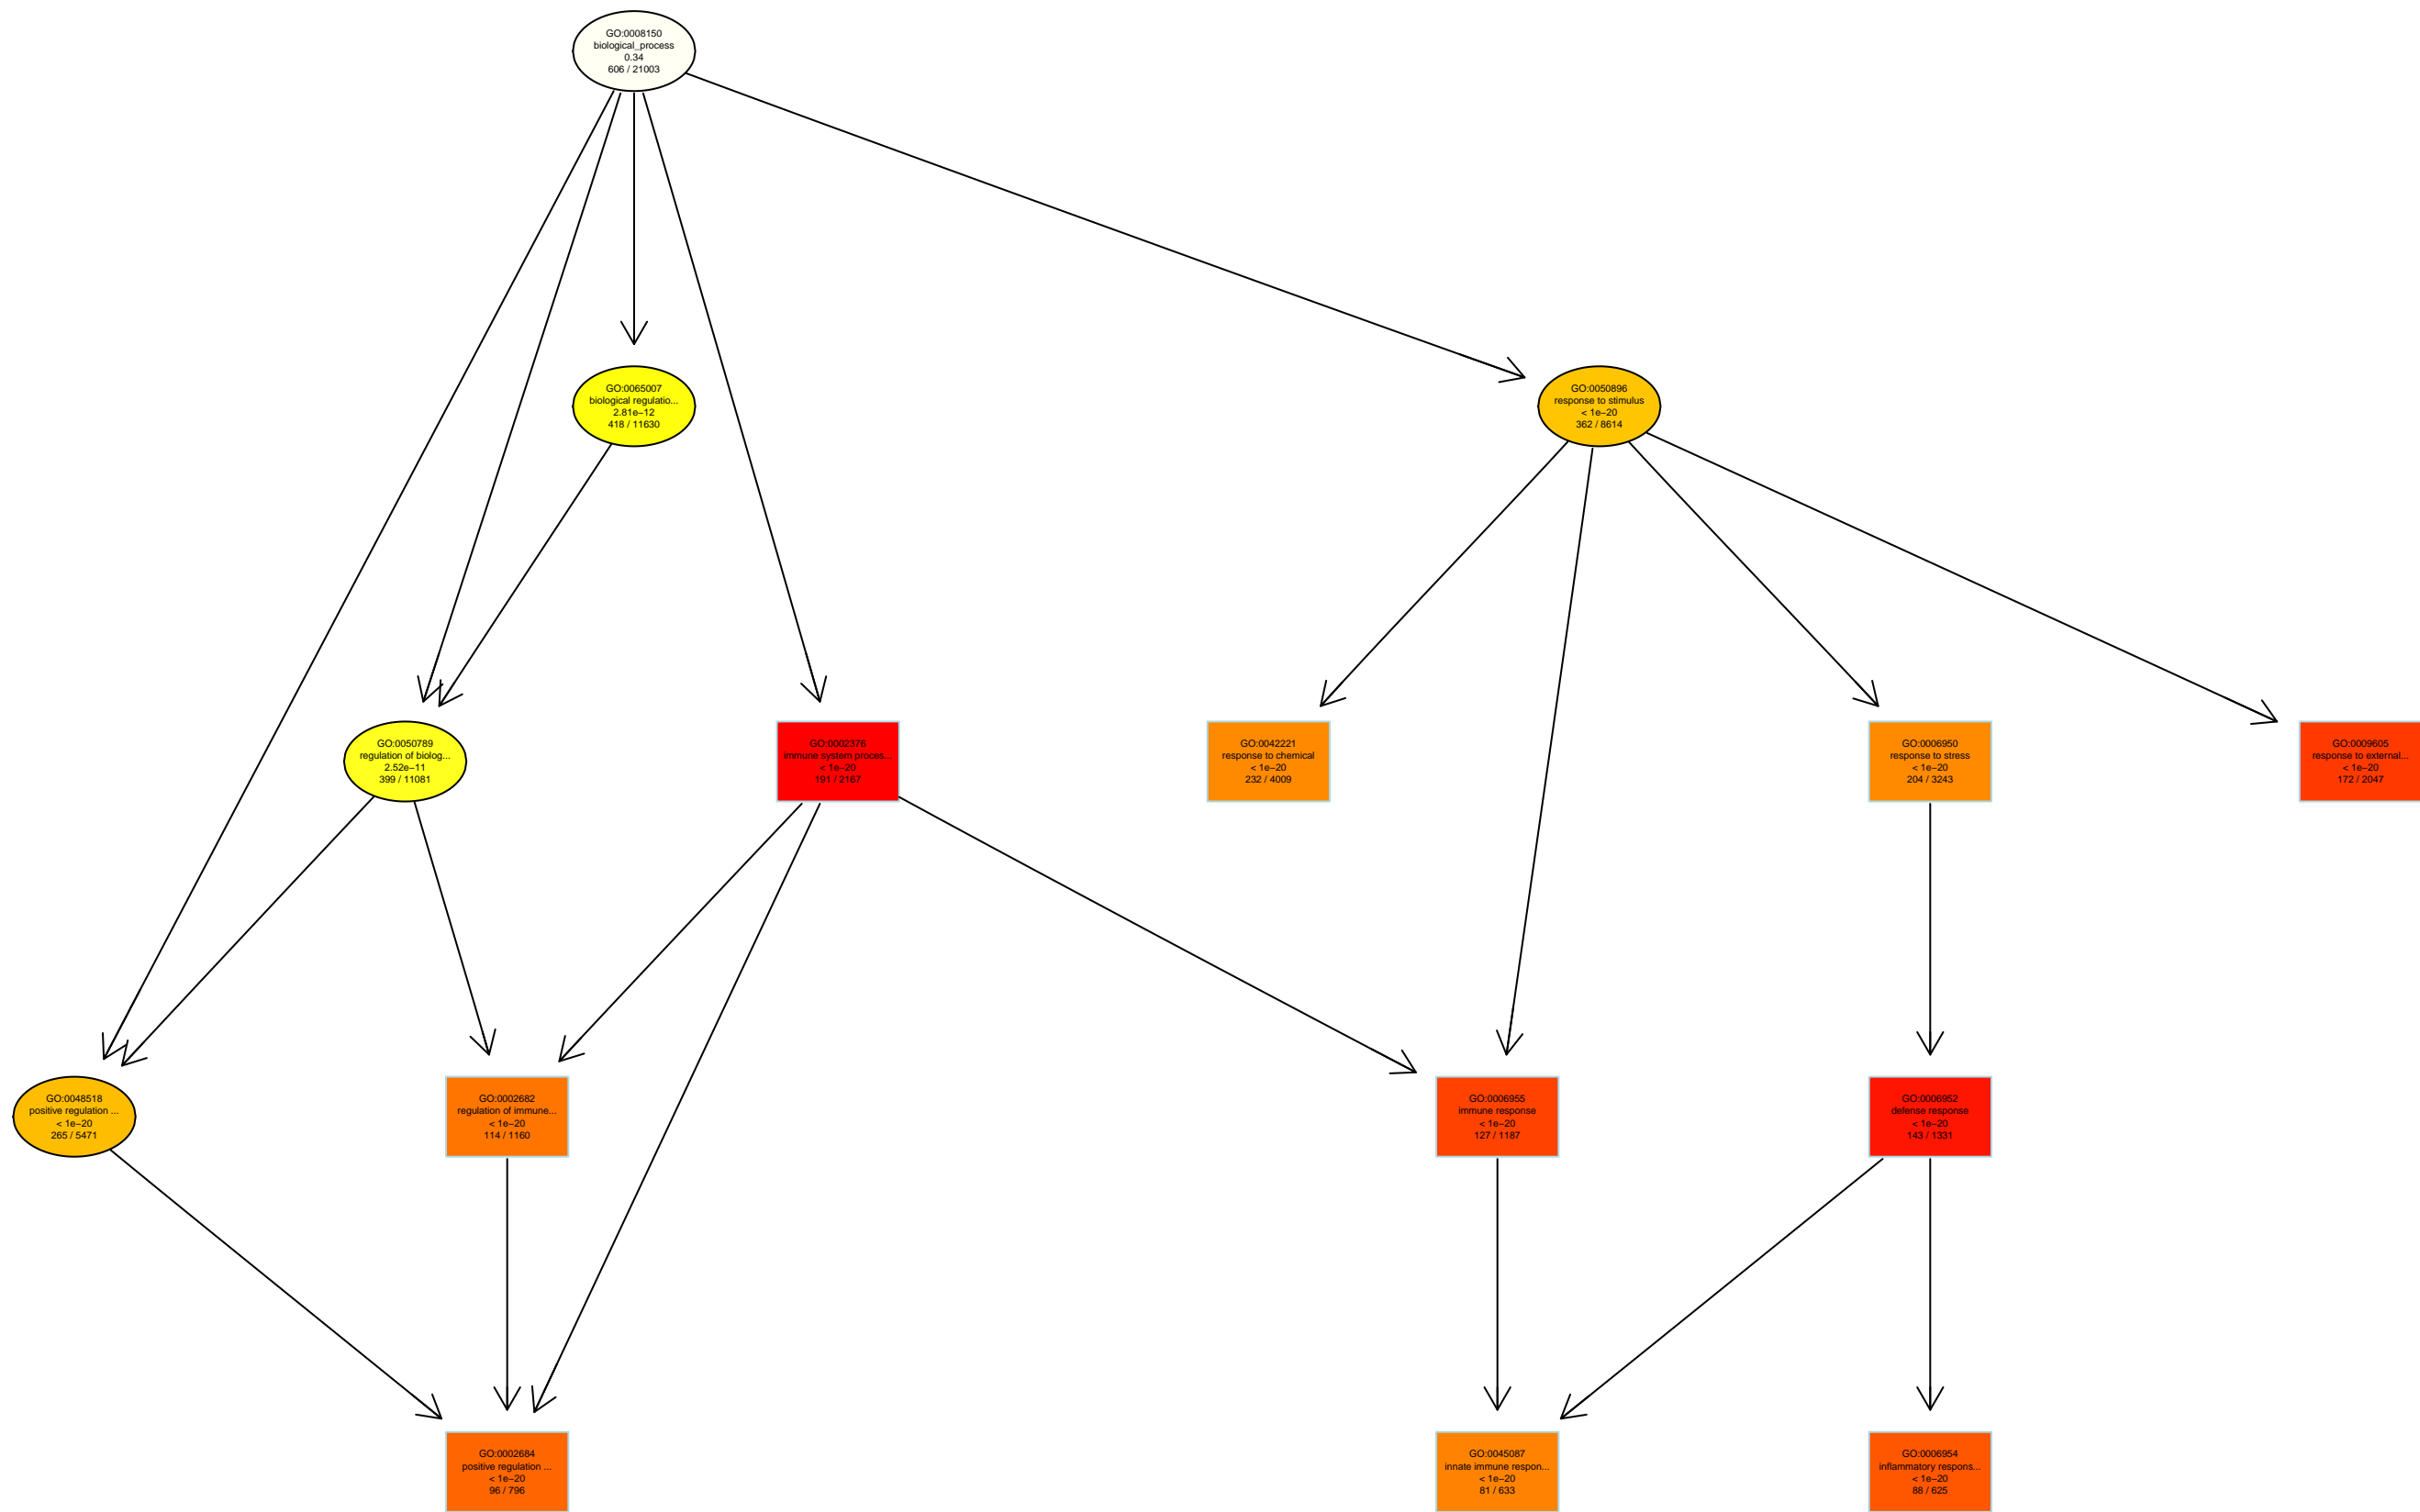

Supplement: s1 [file s1]

KEGG Pathways Enrichment(Top 20)

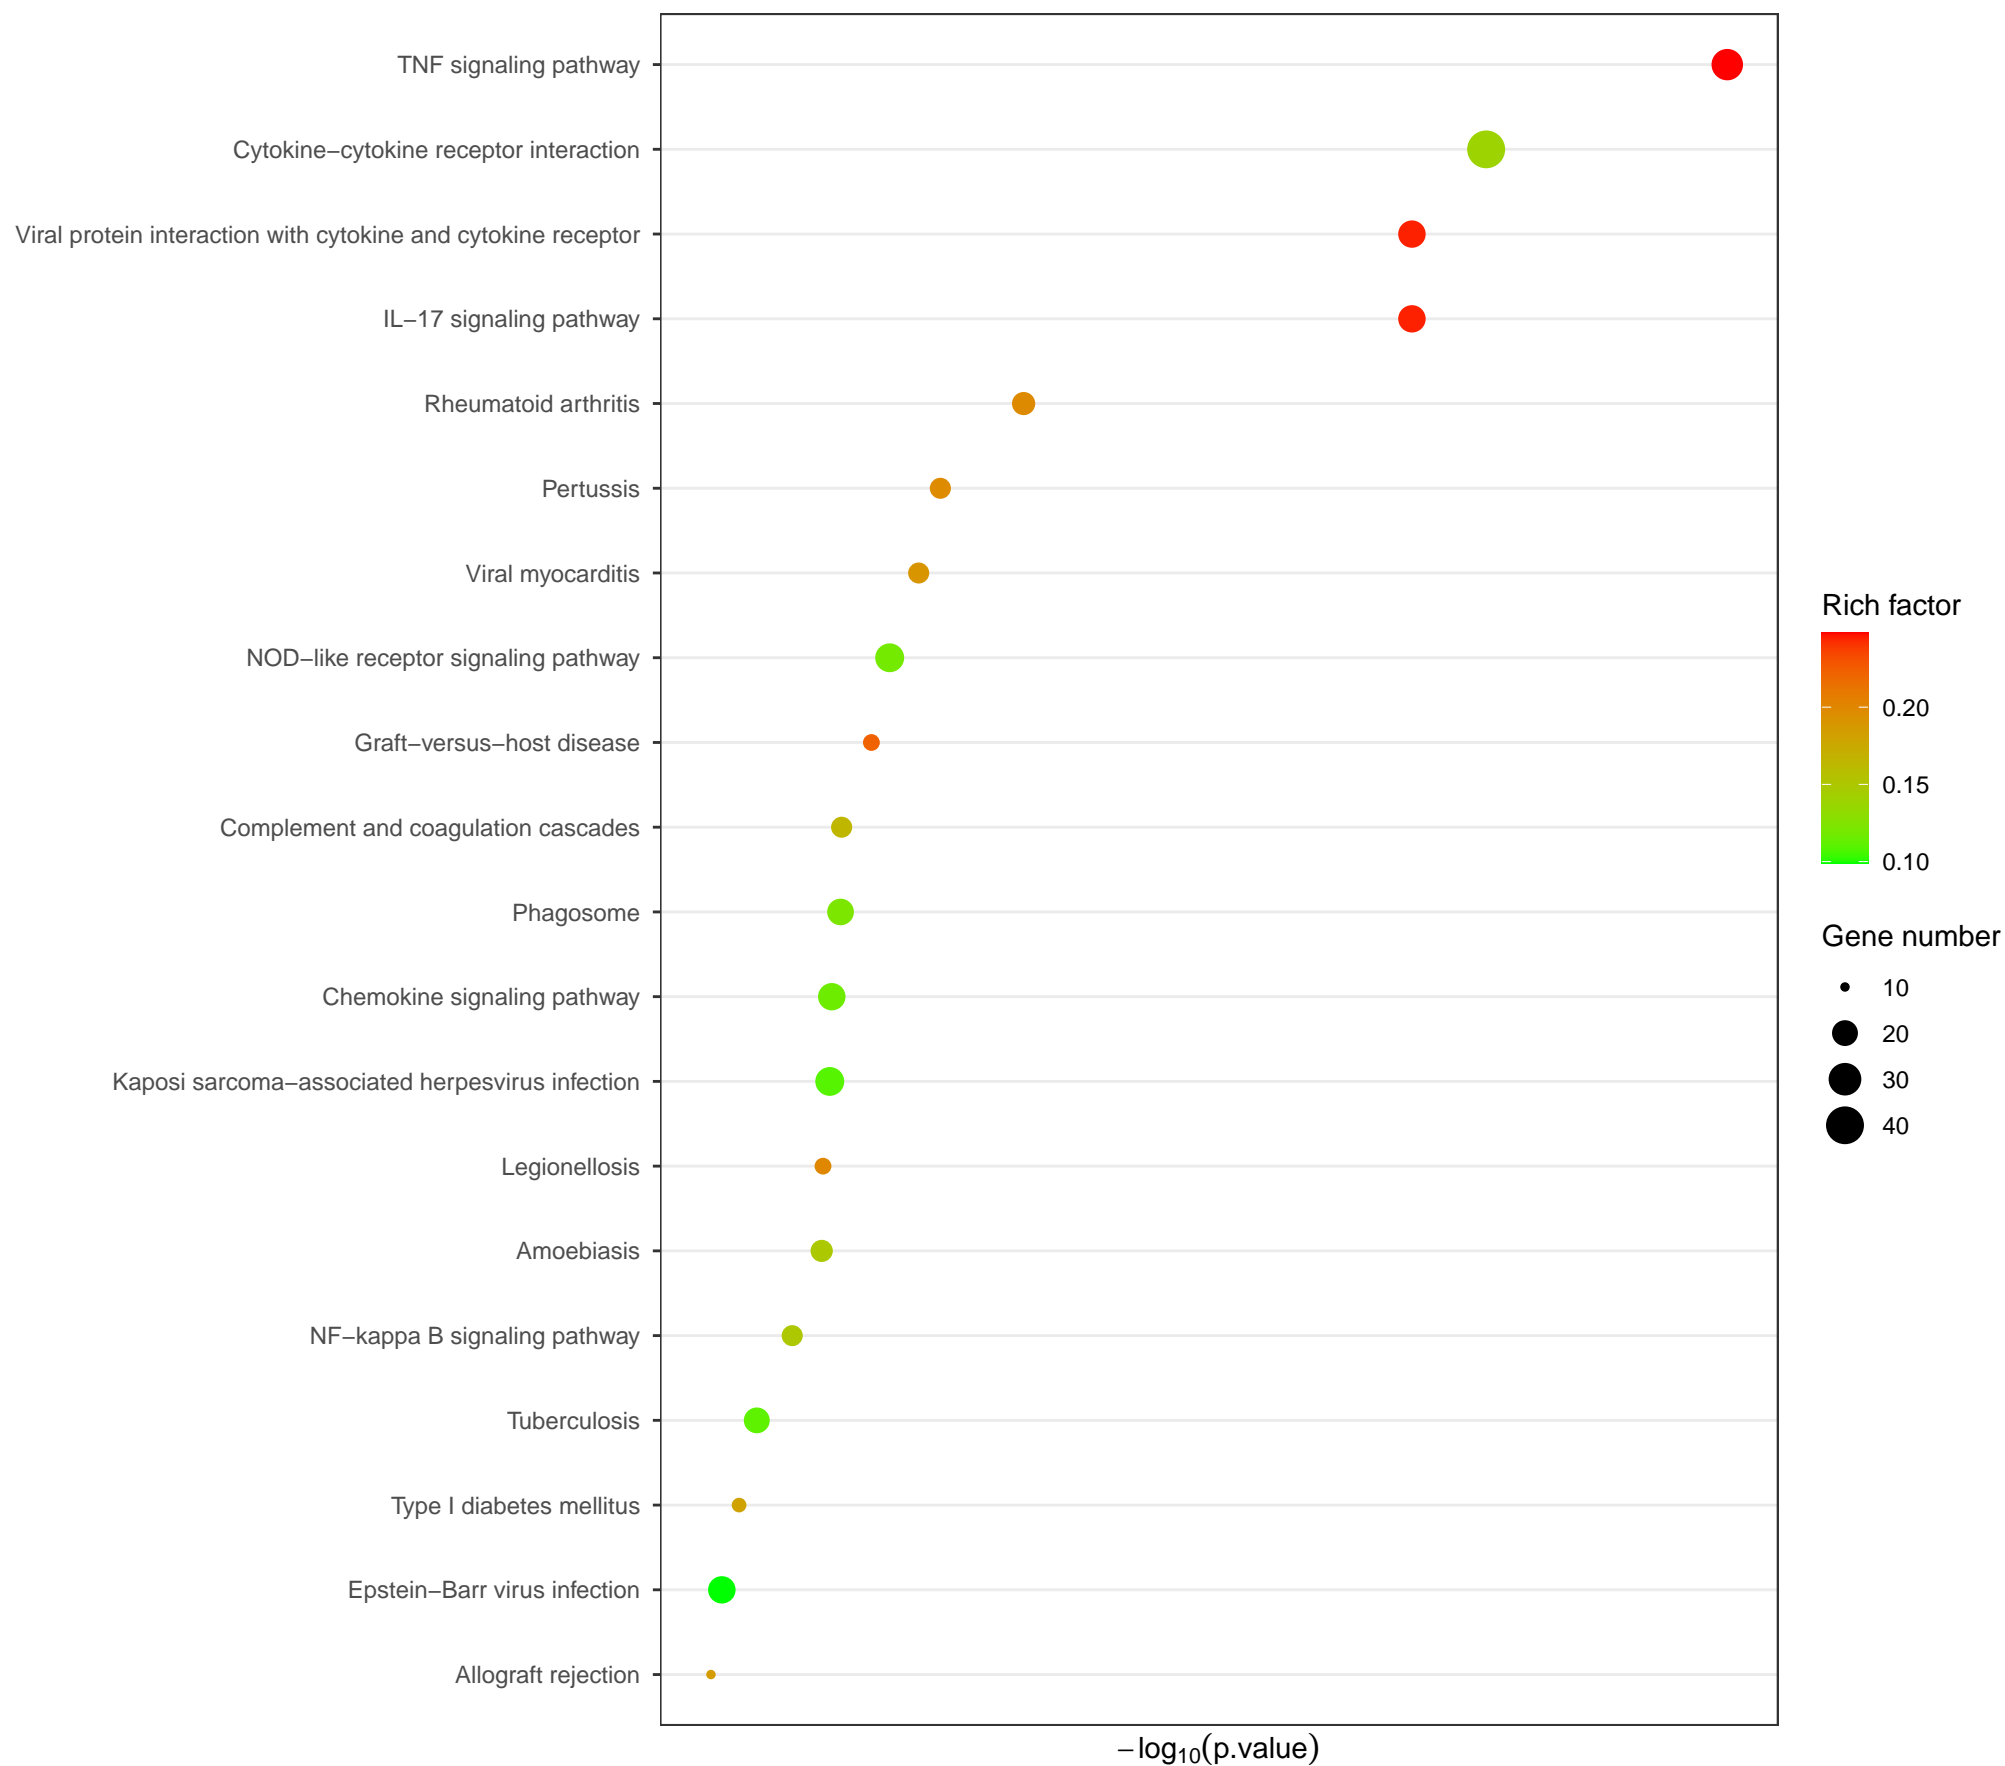

Supplement: s1 [file s1]

KEGG Pathways Enrichment(Top 20)

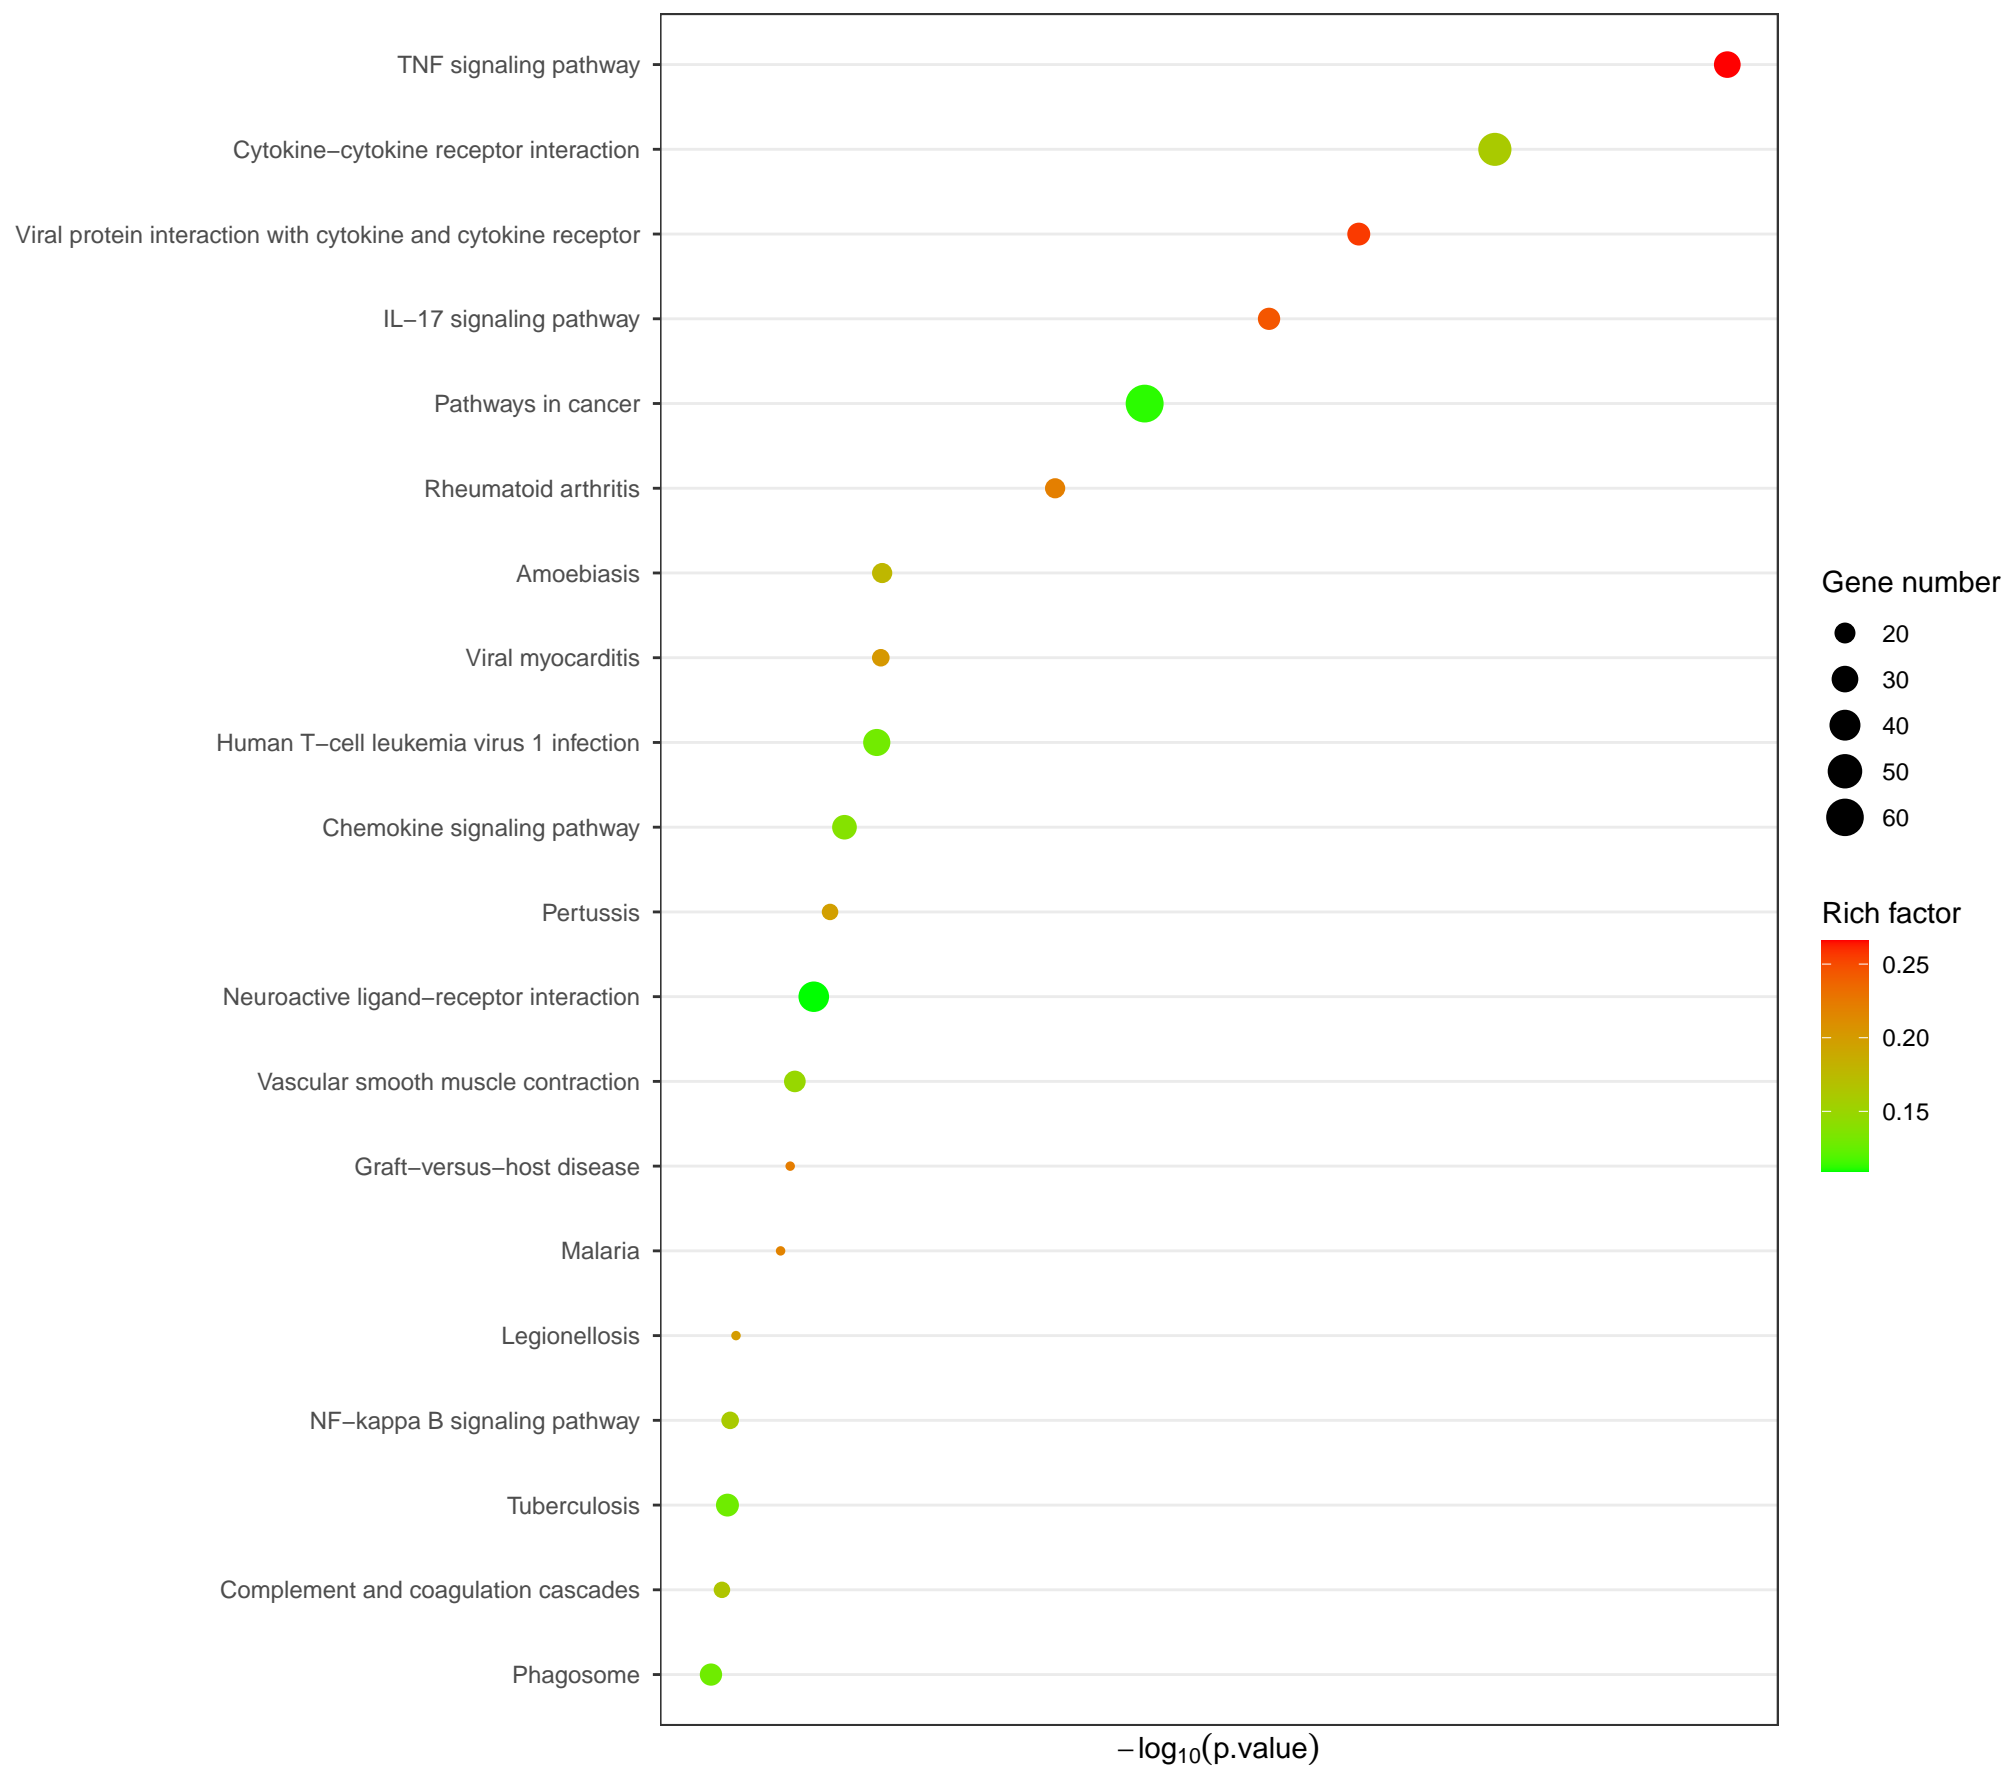

Supplement: s1 [file s1]

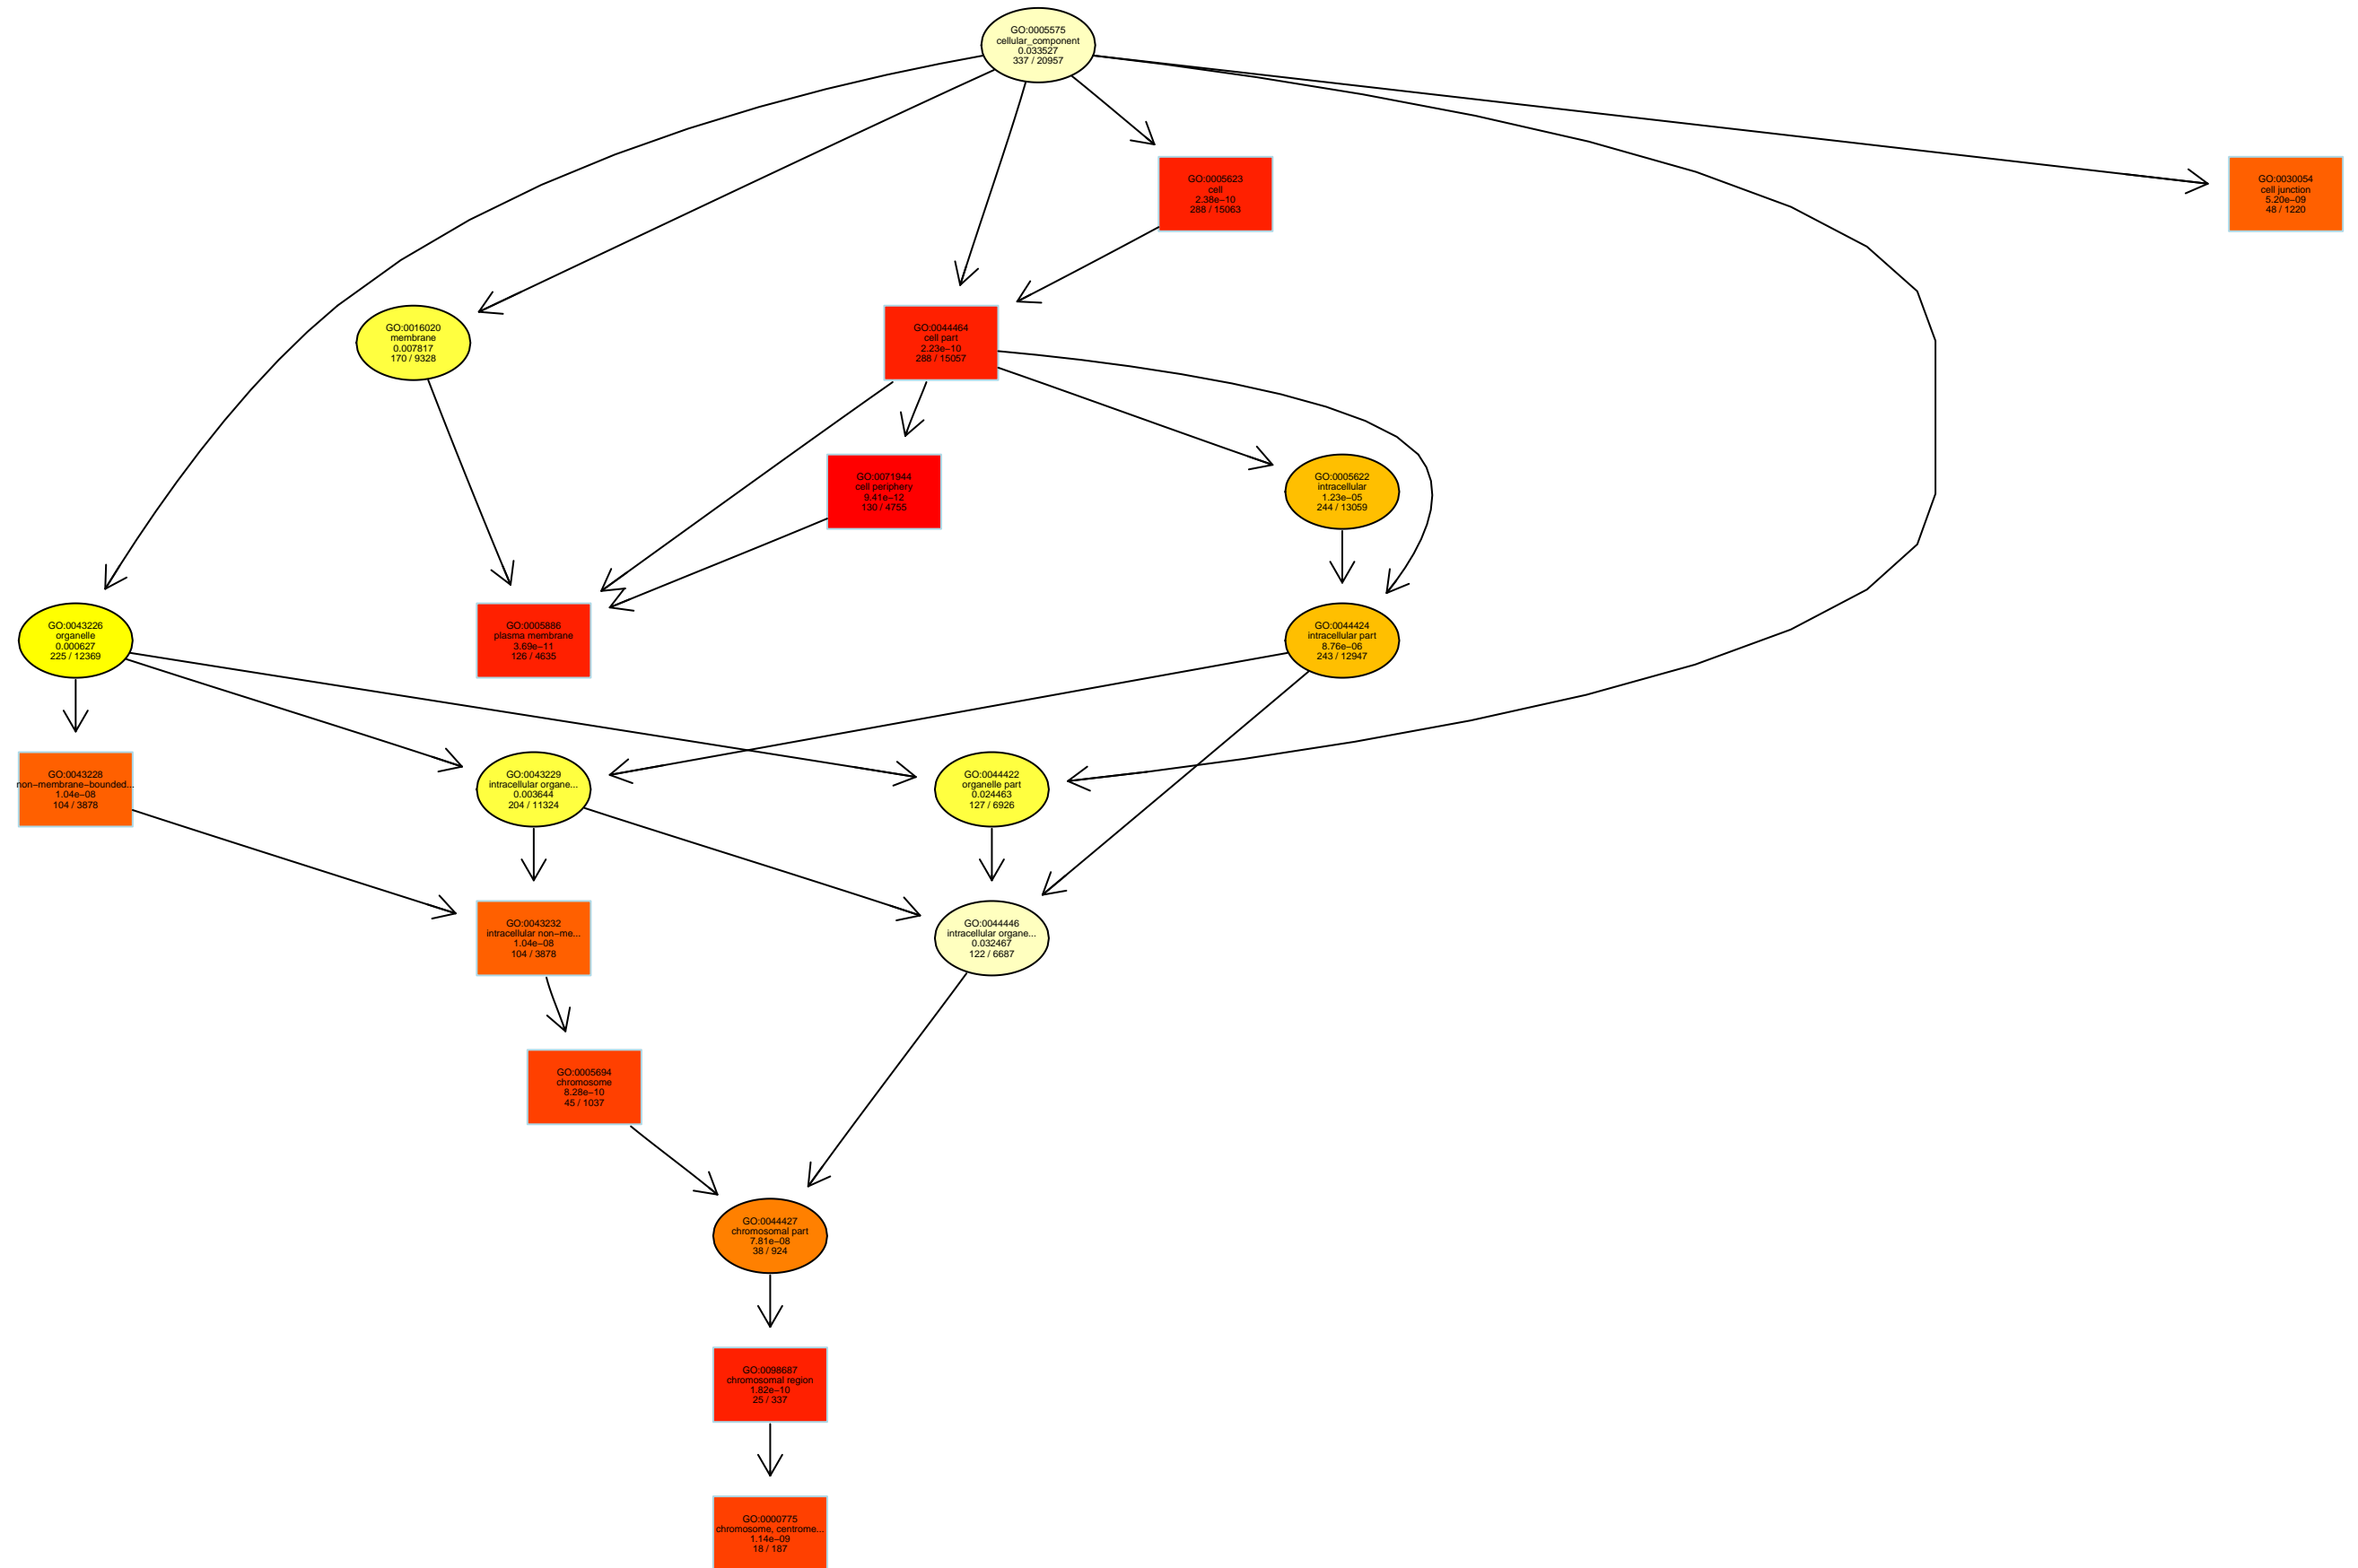

Supplement: s1 [file s1]

# KEGG Pathways Enrichment(Top 20)

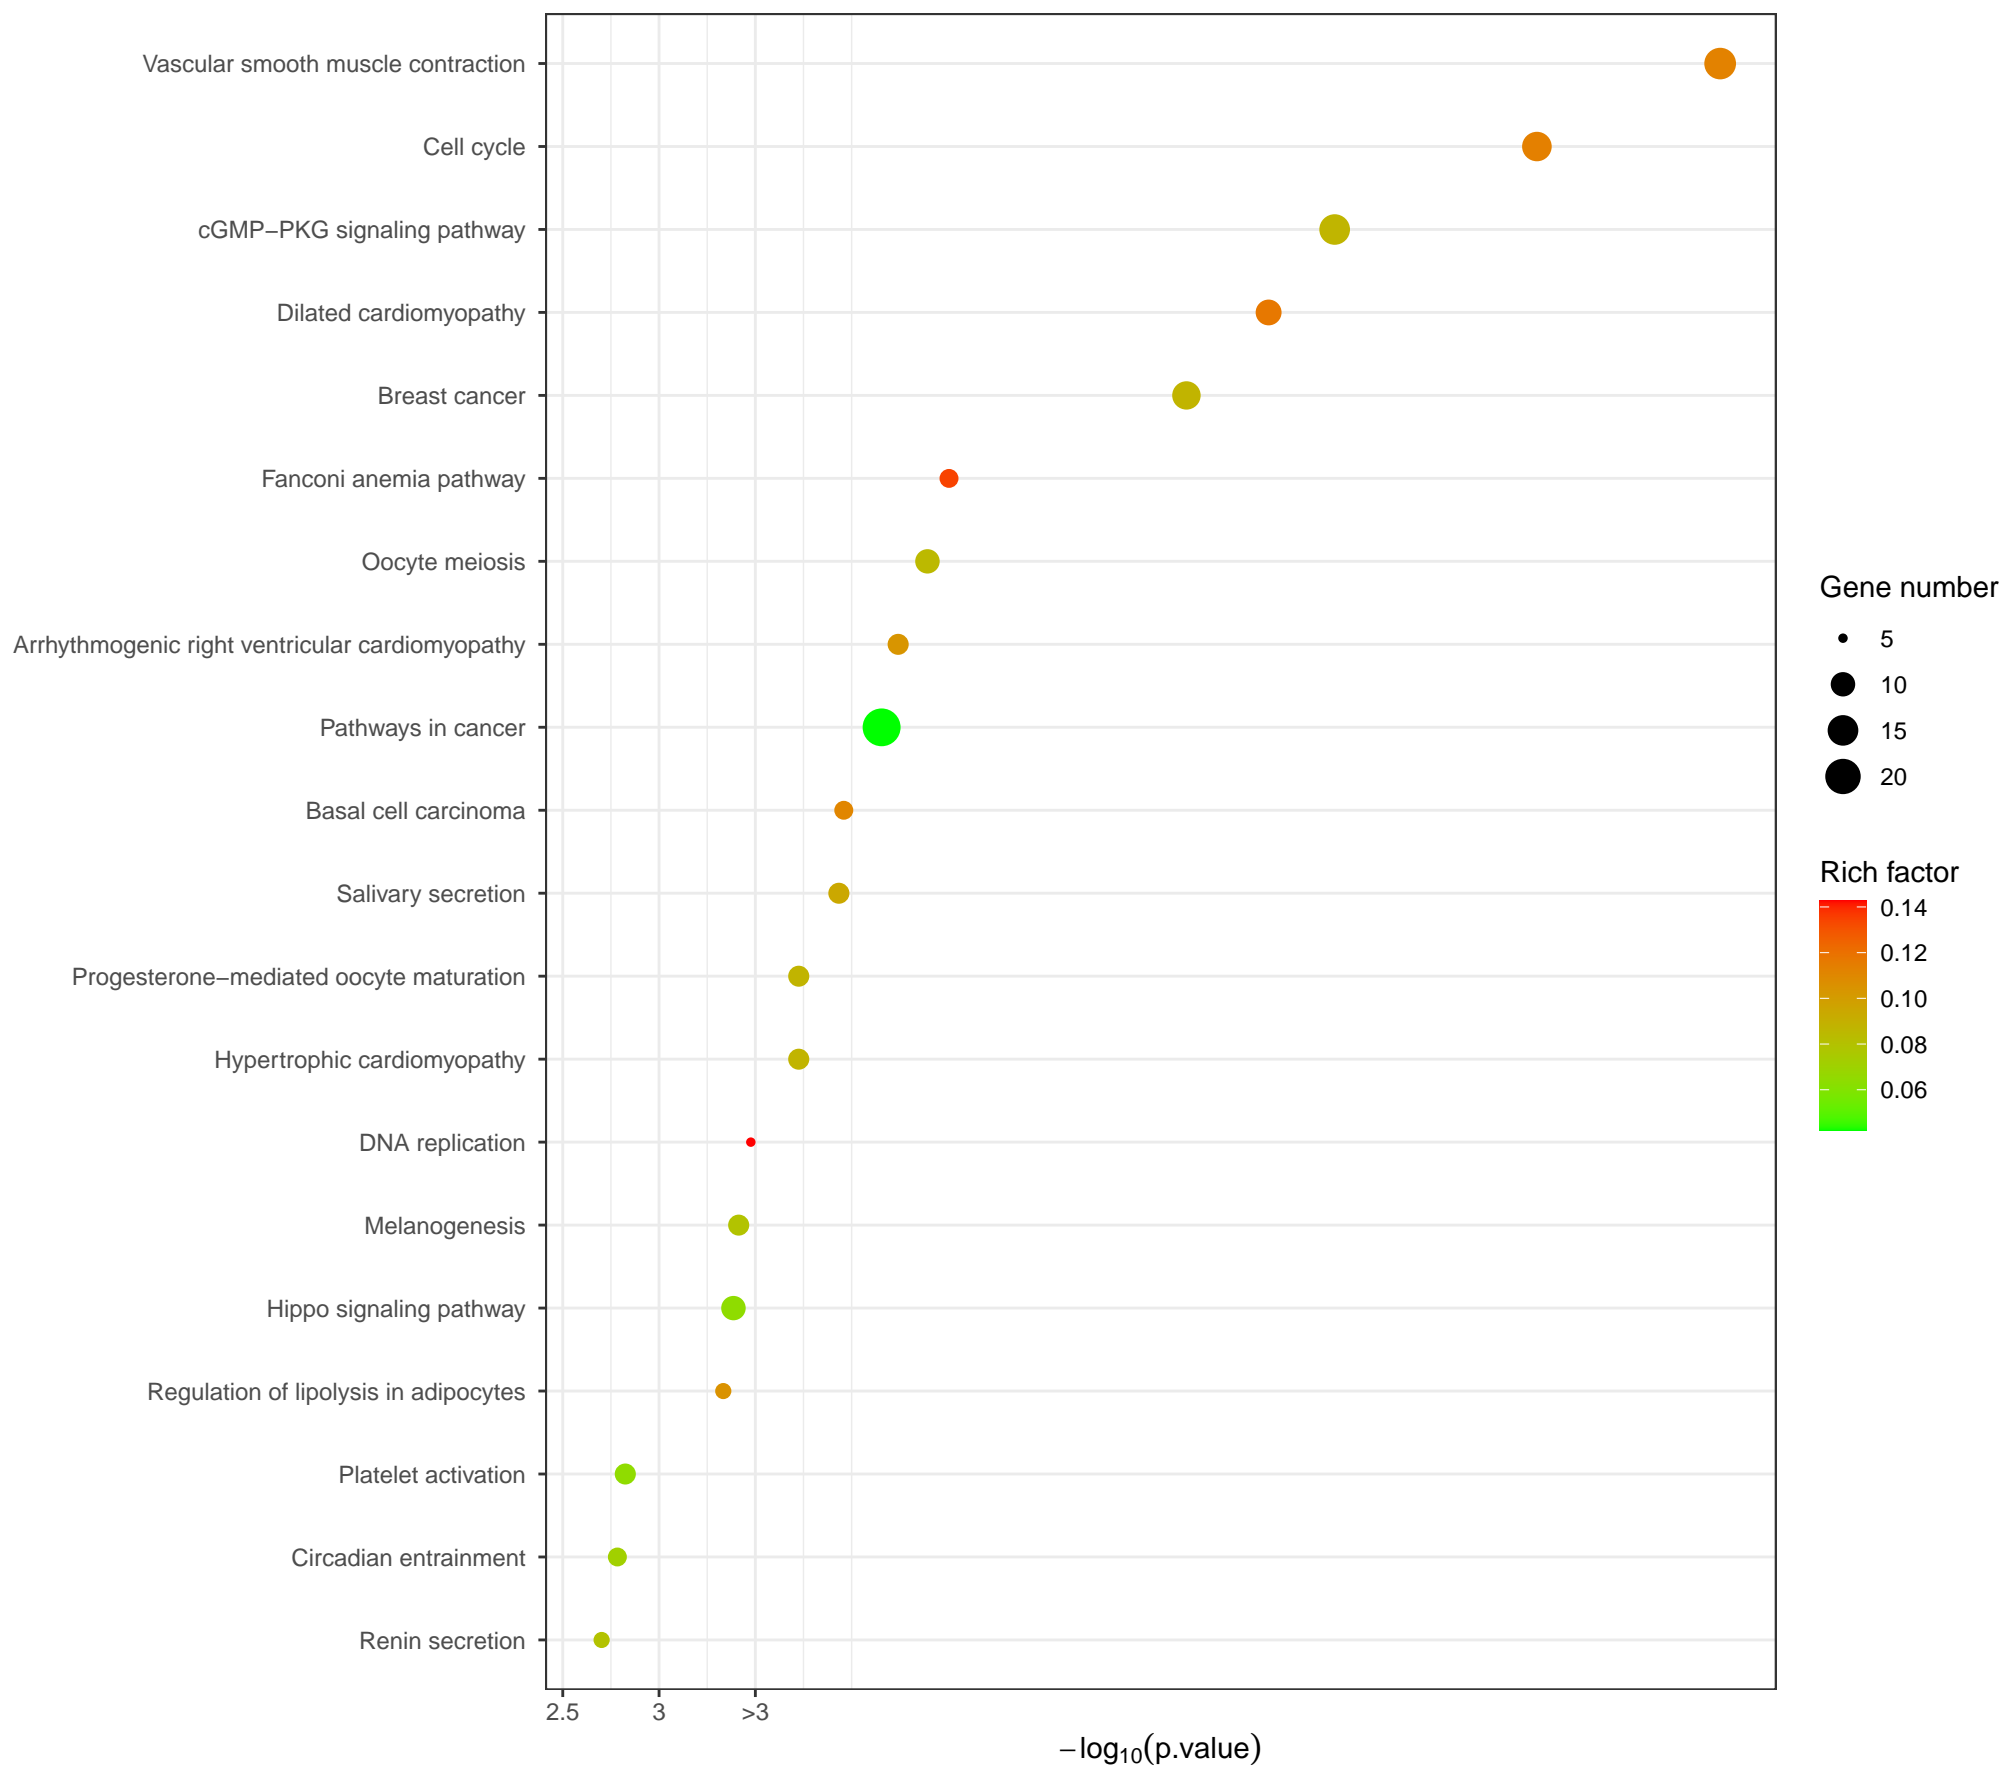

Supplement: s1 [file s1]

# Enriched GO Terms (Top 30)

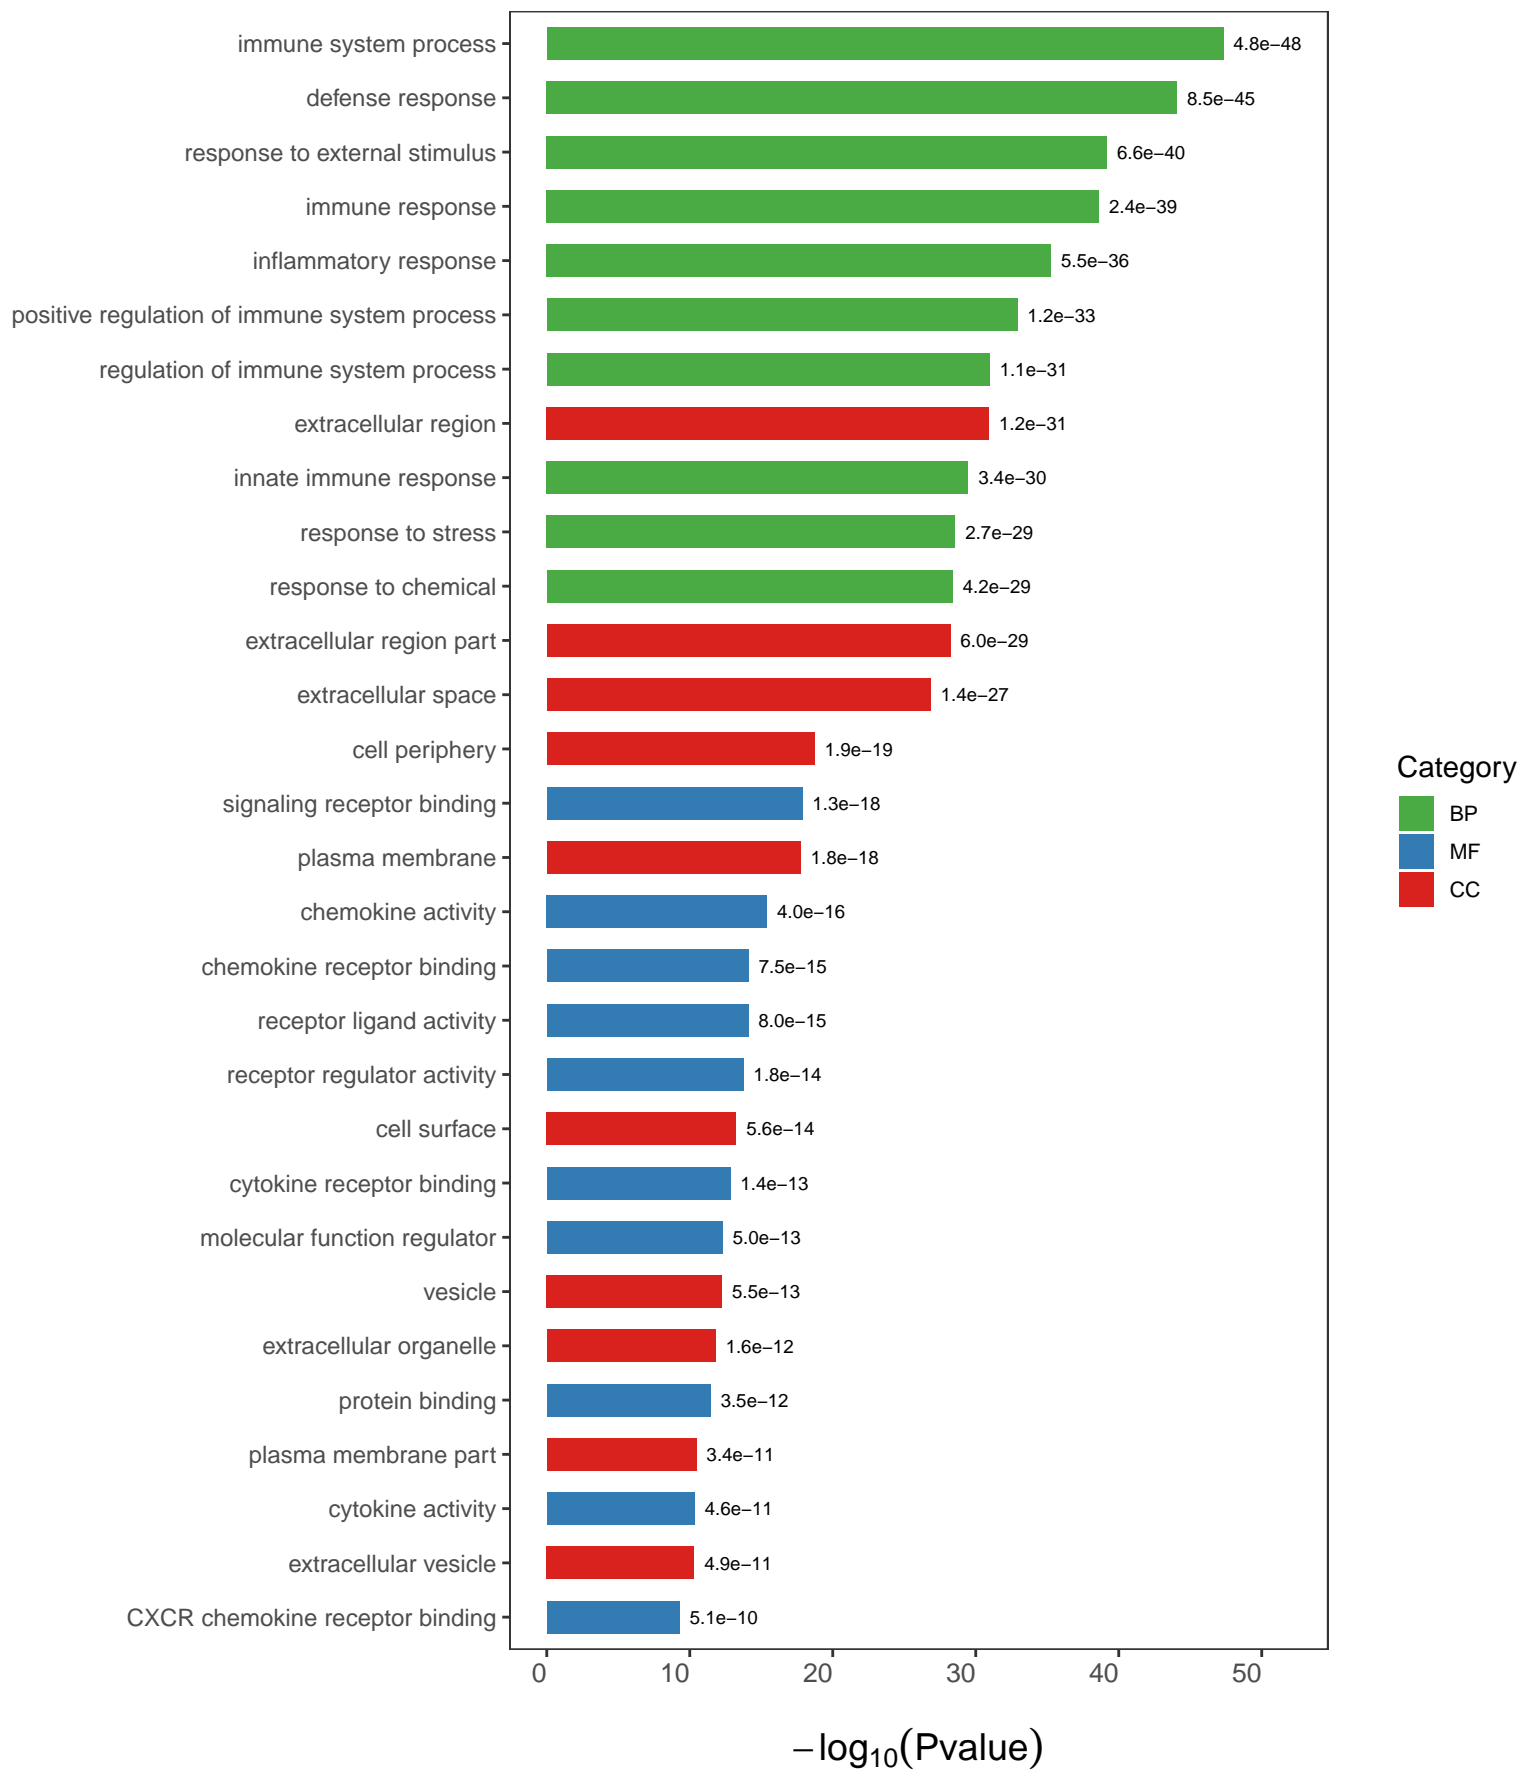

Supplement: s1 [file s1]

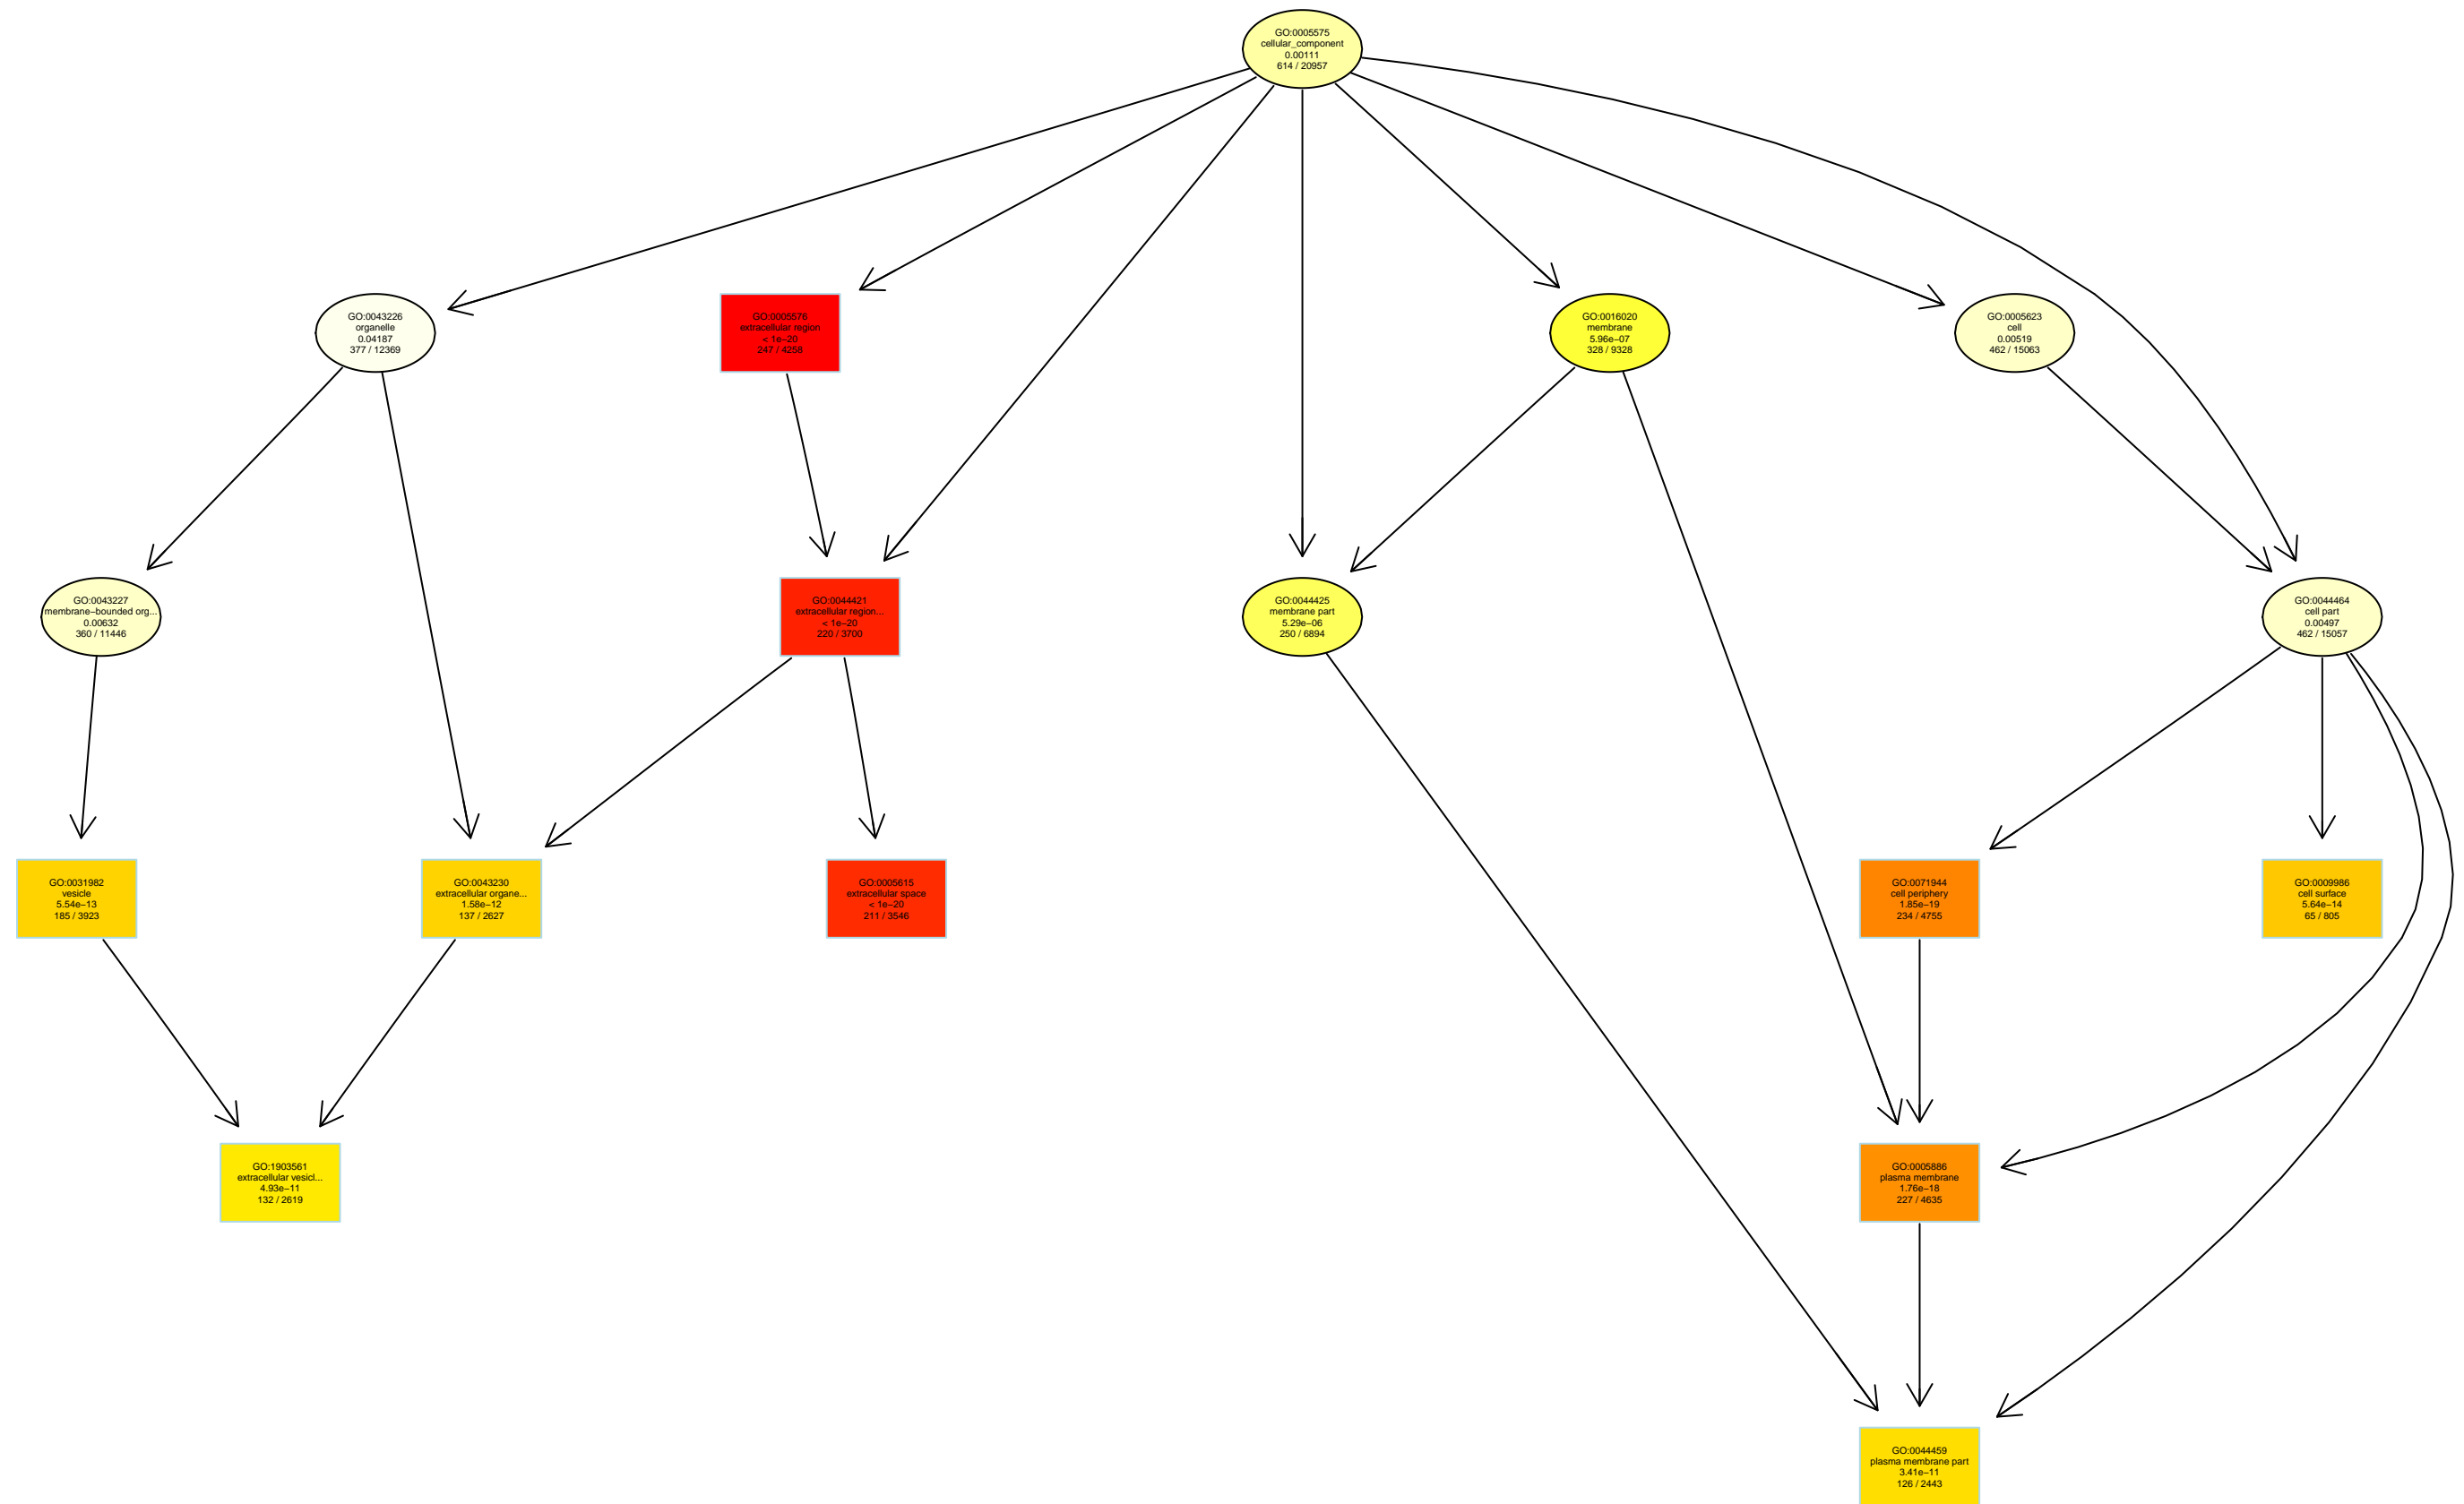

Supplement: s1 [file s1]
